1     **The prophylactic value of TNF- $\alpha$  inhibitors against retinal ganglion cell and optic nerve**  
2                     **axon loss after corneal surgery or trauma**

3 Eleftherios I. Paschalis MSc, PhD<sup>\*</sup>,<sup>1,2,3</sup> Chengxin Zhou PhD<sup>\*</sup>,<sup>1,2,3</sup> Jyoti Sharma, PhD,<sup>1,2,3</sup> Sarah  
4 Kim, BA,<sup>1,2</sup> Fengyang Lei MD, PhD,<sup>1,2,3</sup> James Chodosh, MD, MPH,<sup>1,2,3</sup> Demetrios Vavvas, MD,  
5 PhD,<sup>1,4</sup> Arto Urtti, PhD,<sup>5</sup> George Papaliodis, MD,<sup>1</sup> Claes H. Dohlman MD, PhD<sup>1,2</sup>

6  
7     <sup>\*</sup>Equal contribution

8     <sup>1</sup>Massachusetts Eye and Ear, Department of Ophthalmology, Harvard Medical School, Boston,  
9     MA

10    <sup>2</sup>Schepens Eye Research Institute, Boston Keratoprosthesis Laboratory/Massachusetts Eye and  
11    Ear, Harvard Medical School, Boston, MA

12    <sup>3</sup>Disruptive Technology Laboratory, Massachusetts Eye and Ear, Department of Ophthalmology,  
13    Harvard Medical School, Boston, MA

14    <sup>4</sup>Angiogenesis Laboratory, Massachusetts Eye and Ear, Department of Ophthalmology, Harvard  
15    Medical School, Boston, MA

16    <sup>5</sup>Division of Pharmaceutical Biosciences, University of Helsinki, Finland and School of  
17    Pharmacy, University of Eastern Finland, Kuopio, Finland.

18    **Corresponding author and reprints:** Claes H. Dohlman, Massachusetts Eye and Ear, Boston,  
19    MA 02114, e-mail: [claes\\_dohlman@meei.harvard.edu](mailto:claes_dohlman@meei.harvard.edu), or Eleftherios I. Paschalis, Boston  
20    Keratoprosthesis Laboratory, Department of Ophthalmology, Massachusetts Eye and Ear and  
21    Schepens Eye Research Institute, email: [eleftherios\\_paschalis@meei.harvard.edu](mailto:eleftherios_paschalis@meei.harvard.edu), and Harvard  
22    Medical School, Boston, MA 02114, USA.

23    **Conflict of Interest:** The authors have declared that no conflict of interest exists

24    **Key Words:** Glaucoma; inflammation; TNF- $\alpha$  antibodies; biologics; sub-conjunctival.

25    **Running title:** Retinal protection with subconjunctival anti-TNF- $\alpha$  administration.

26    **Funding:** Supported by Boston Keratoprosthesis funds

## 27 **Abstract**

28 **Background and Purpose:** Late secondary glaucoma is an often severe complication  
29 after anterior segment surgery, trauma, infection, etc. TNF- $\alpha$  is a major mediator that is rapidly  
30 upregulated and causes retinal cell apoptosis and optic nerve axon degeneration (mediating steps  
31 to glaucomatous damage). Anti-TNF- $\alpha$  antibodies are in animals very effective in protecting the  
32 ganglion cells and the optic nerve—and might therefore be useful prophylactically against  
33 secondary glaucoma in patients. Here we evaluate 1) toxicity and 2) efficacy of two TNF- $\alpha$   
34 inhibitors (adalimumab and infliximab), in rabbits by subconjunctival administration.

35  
36 **Methods:** For drug *toxicity*, animals with *normal, unburned* corneas were injected with  
37 adalimumab (0.4, 4, or 40 mg), or infliximab (1, 10, or 100 mg). For drug *efficacy*, other animals  
38 were subjected to alkali burn before such injection, or steroids. The rabbits were evaluated  
39 clinically with slit lamp and photography, electroretinography, optical coherence tomography,  
40 and intraocular pressure manometry. Some eyes were stained *ex vivo* after 3 days for retinal  
41 ganglion cell apoptosis (TUNEL). In other experiments the optic nerves were evaluated with  
42 paraphenylenediamine staining after 50 or 90 days. Loss of retinal ganglion cells and optic nerve  
43 degeneration were quantified.

44  
45 **Results:** Subconjunctival administration of 0.4 mg or 4.0 mg adalimumab were well tolerated,  
46 whereas 40.0 mg was toxic to the retina. 1, 10, or 100 mg infliximab were also well tolerated.  
47 Analysis of the optic nerve axons after 50 days confirmed the safety of 4.0 mg adalimumab or of  
48 100 mg infliximab.

49 For *efficacy, 4.0 mg adalimumab subconjunctivally in 0.08 mL* provided practically full  
50 protection against ganglion cell apoptosis 3 days following alkali burn, and infliximab 100 mg  
51 only slightly less. At 90 days following a burn, the control optic nerve showed about 50% axon  
52 loss but only about 8% if protected with adalimumab.

53  
54 **Conclusions:** *Subconjunctival injection of 4.0 mg adalimumab* in rabbits shows no eye  
55 toxicity and provides excellent neuroprotection, short (3 days) and long-term (90 days). *Our total*  
56 *accumulated data from several studies, z combined with the present paper, suggest that corneal*

Updated 10-08-2022

57 *injuries, including surgery, might benefit from routine administration of anti-TNF- $\alpha$  biologics to*  
58 *reduce inflammation and future secondary glaucoma.*

59

60

61

62

63

64

65

66

67

68

69

70

71

72

73

74

75

76

77

78

79

80

81

82

83

84

85

86

87 **Introduction**

Updated 10-08-2022

88 It is well known and well documented by clinical ophthalmologists that acute traumatic events to  
89 the cornea (e.g. chemical burns, ruptured globes, infections), as well as standard penetrating  
90 corneal surgery (such as transplantations, keratoprosthesis (KPro), lacerations, etc.), often  
91 develop a late sight-threatening optic nerve neuropathy that phenotypically appears similar or  
92 identical to chronic open-angle or closed-angle glaucomas<sup>1-30</sup>. However, due to having an  
93 identifiable triggering cause, this category has often been labeled “secondary glaucoma.”  
94 Secondary glaucoma is the most consequential complication after corneal surgery.

95  
96 The magnitude of this secondary glaucomatous complication has most likely been  
97 underestimated in the past due to its frequently delayed manifestation, sometimes many years  
98 (“time bomb”). Epidemiological studies on secondary glaucoma are therefore limited and  
99 numbers citing incidence and outcomes vary substantially with geography and level of economy  
100 of the area<sup>31-37</sup>. One source estimated that about 6 million patients in the world have secondary  
101 glaucoma compared with 67 million with the primary glaucomas<sup>4</sup>. In totality, the prevalence of  
102 secondary glaucoma across the world has been stated to vary from 6 to 22% among various  
103 glaucoma studies<sup>31</sup>. WHO in 2002 estimated the prevalence of *blindness* from secondary  
104 glaucoma to be 2.7 million people worldwide<sup>37</sup>. Glaucomatous blindness is of course presently  
105 irreversible.

106  
107 The immediate cause of secondary glaucoma, according to many studies, has been primarily  
108 attributed to surgery or trauma with corresponding inflammation rather than to chronic  
109 diseases<sup>32</sup>—pointing to “an acute single-event episode.” Such an acute episode should require  
110 only a relatively short period of treatment, including prophylaxis against complications such as  
111 secondary glaucoma. The majority of postsurgical glaucoma has been described as unilateral, but  
112 the eventual visual outcome has been severe with a very high percentage of angle closure<sup>31</sup>.

113  
114 With regards to the pathophysiology of secondary glaucoma there have been recent shifts of  
115 view. The IOP was almost universally blamed in the past, especially in cases of angle closure  
116 with markedly elevated pressure. However, difficulties in explaining glaucomatous damage fully  
117 in the presence of “normal” pressure has led to a greater interest in neuroinflammation and  
118 genetics<sup>38-45</sup>. In fact, an intensive research effort has been directed towards key inflammatory

Updated 10-08-2022

119 mediators for glaucoma in general, rather than strictly mechanical (IOP) factors (see a review<sup>39</sup>).  
120 The TNF- $\alpha$  pathway has received attention in its involvement in these processes.  
121  
122 Our observations in the 1990ies of the often-dramatic effect of anti-TNF- $\alpha$  antibodies in  
123 preventing destructive cornea melt around keratoprotheses in autoimmune patients<sup>43,44,46-49</sup>  
124 stimulated a series of experimental studies on the pathophysiology of such treatment<sup>49-53</sup>. With  
125 secondary glaucoma in mind, we focused on the model of alkali burns of the cornea. These  
126 studies showed that such an alkali burn can upregulate TNF- $\alpha$  anteriorly which will very rapidly  
127 diffuse to the retina and result in considerable apoptosis of the ganglion cells (TUNEL), and  
128 degeneration of their nerve axons (“the hallmarks of glaucoma”). It had earlier been shown in  
129 studies by Kinoshita et al. that other cytokines could reach the retina in early stages after corneal  
130 burn<sup>59</sup>. (The alkali itself cannot reach the retina—it is effectively buffered at the iris plane<sup>50,52,60</sup>.)  
131 These events occur very rapidly while IOP is still normal or low, pointing to the existence of a  
132 rapid, inflammatory, IOP-independent pathway to secondary glaucomatous damage after acute  
133 events elsewhere in the eye<sup>61</sup>. These results have later been corroborated elsewhere<sup>62</sup>.  
134  
135 Thus, at present, it is not known clinically how much of any late secondary glaucoma may be  
136 due to this newly identified pathway in contrast to the classic IOP-triggered influence, but it  
137 would be advisable to probe further, especially since *prophylactic prevention* should be a  
138 possibility since drugs are already available and can be promptly applied. Thus, importantly, it  
139 has been shown that not only corticosteroids but also monoclonal antibodies (mAbs) to TNF- $\alpha$ ,  
140 such as etanercept, infliximab, or adalimumab, can be markedly protective of the ganglion cells  
141 from damage in animals if administered rapidly enough systemically after the instigating event<sup>50</sup>,  
142 <sup>52,63</sup>. In recently published animal work, we have further demonstrated that prolonged  
143 administration of anti-TNF- $\alpha$  antibody to the retina can be achieved by subconjunctival  
144 implantation of a polymer-based drug delivery system (DDS)<sup>64</sup>. Although the DDS was loaded  
145 with only 85  $\mu$ g of infliximab (~30  $\mu$ g/kg), a biological effect was observed for over a month,  
146 manifested by a significant reduction of retinal cell apoptosis after an alkali burn to the cornea<sup>65</sup>.  
147  
148 However, of considerable importance are also previous findings in animals that not only the  
149 described rapid inflammatory response can be suppressed by the biologics but also, quite likely,

Updated 10-08-2022

150 the classic IOP-triggered insult as well, since the optic nerve degeneration found after 3 months  
151 could have resulted from either or both pathways. Several of these studies showed a very marked  
152 effect of the antibodies to protect the ganglion cells and the optic nerve (50-100% protection),  
153 strengthening the possibility of prophylaxis of secondary glaucoma at the time of the  
154 inflammatory event (surgery, trauma, etc.), and perhaps also shortly afterwards. These findings  
155 alone should have substantial therapeutic promise.

156

157 Because of these insights and therapeutic possibilities, it seems that further investigations of the  
158 ocular use of anti-inflammatory biologics are warranted. Not only postoperative glaucoma is at  
159 stake but also other inflammatory complications such as corneal tissue melt, retroprosthetic  
160 membranes, uveitis, vitritis, retinal detachments, etc. This study is meant to focus specifically on  
161 the following issues: The risks and benefits of the two presently leading marketed TNF- $\alpha$   
162 inhibitors (adalimumab and infliximab), when administered locally to the eyes, should be  
163 clarified. Also, it is still not clear whether a drug delivery system (DDS) is the most practical  
164 way for the administration, or whether a single injection of an agent would suffice—and be safer  
165 and more practical—or whether intravitreal or systemic route would still be preferable for long-  
166 term use. The present study has therefore attempted to investigate the toxicity and efficacy of  
167 such anti-inflammatory administration by the *subconjunctival* route.

168

## 169 **Materials and Methods**

### 170 **Rabbit model**

171 All animal-based procedures were performed in accordance with the Association For Research in  
172 Vision and Ophthalmology Statement for the Use of Animals in Ophthalmic and Vision  
173 Research, and the National Institutes of Health Guidance for the Care and Use of Laboratory  
174 Animals. This study was approved by the Animal Care Committee of the Massachusetts Eye and  
175 Ear Infirmary and Schepens Eye Research Institute. 32 Dutch-belted pigmented rabbits were  
176 used for this study and were obtained from Covance (Dedham, MA, USA). Rabbits were used at  
177 the ages of 4-10 months.

178

179 **Rabbit anesthesia, recovery, and euthanasia**

180 Rabbits were anesthetized with intramuscular injection of ketamine hydrochloride INJ, USP (35  
181 mg/kg; KetaVed, VEDCO, St. Joseph, MO, USA), xylazine (5 mg/ kg; AnaSed, LLOYD,  
182 Shenandoah, IA, USA), and acepromazine (0.75 mg/kg; PromAce®, Boehringer Ingelheim  
183 Vetmedica, Inc. MO, USA). Reversal of anesthesia was obtained with intravenous (IV)  
184 yohimbine (0.1 mg/kg; Yobine, LLOYD) administration in a marginal ear vein. Rabbits were  
185 placed on a warm pad until becoming sternal and able to move. Anesthetized rabbits were  
186 euthanized at the completion of the experiment with 100 mg/kg Fatal Plus IV injection (sodium  
187 pentobarbital).

188

189 **Retinal injury**

190 Sterile inflammatory retinal injury was accomplished by applying a corneal surface alkali burn,  
191 an established retinal injury model<sup>50,52</sup>. Topical anesthetic (0.5% proparacaine hydrochloride,  
192 Bausch & Lomb, Tampa, FL, USA) was applied to the study eye while the contralateral eye was  
193 protected using GenTeal gel (Alcon, Fort Worth, TX, USA). Alkali burn was performed by using  
194 an 8-mm diameter filter paper soaked in 2 N NaOH that was applied to the center of the cornea  
195 for 10 seconds followed by immediate eye irrigation with saline solution for 15 minutes.  
196 Buprenorphine (0.03 mg/kg; Buprenex Injectable, Reckitt Benckiser Health- care Ltd, United  
197 Kingdom) was administered subcutaneously prior to the burn procedure for pain management  
198 and a transdermal fentanyl patch (12 mcg/hr; LTS Lohmann Therapy System, Corp., NJ, USA)  
199 was placed on the right skin to alleviate pain for 3 days.

200

201 **Dose titration of anti-TNF- $\alpha$  and monoclonal antibodies**

202 Two FDA approved TNF- $\alpha$  inhibitors were selected: a) infliximab (Remicade® Janssen Biotech  
203 Inc., Johnson and Johnson, Titusville, NJ, USA), and b) adalimumab (Humira® Abbvie Inc.,  
204 North Chicago, IL, U.S.A.). Infliximab was reconstituted in 0.8 mL sterile saline for injection  
205 and administered subconjunctivally at 1, 10, or 100 mg dose (n=3) in otherwise intact eyes  
206 immediately after the irrigation of alkali injury. Likewise, adalimumab in 0.08 mL saline was

207 administered subconjunctivally at 0.4 mg, 4 mg, and 40 mg dose (n=3). Two sham injection  
208 (control) animals were used (one for each study group) that received 0.8 mL of sterile saline  
209 subconjunctivally without drug. Subconjunctival injections of infliximab were performed using a  
210 30-G needle and adalimumab using the pre-fitted syringe needle.

211

## 212 **Clinical Evaluation**

213 Clinical evaluation was performed on all rabbits before and after treatment and 0.5%  
214 proparacaine hydrochloride was applied to the operated eyes. Eyes were photographed using a  
215 digital SLR camera (Nikon, Tokyo, Japan) attached to a surgical microscope (S21; Carl Zeiss,  
216 Jena, Germany). Remote photography was performed using an iPhone 7plus (Apple Inc) fitted  
217 with a magnifying clip-on lens (12x, Pictek Fisheye Lens, Amazon.com Inc, WA, USA).

218

## 219 **IOP measurements**

220 Intraocular pressure measurements were performed in anesthetized rabbits using a custom-made  
221 intracameral pressure transducer connected to a 27-gauge needle. The device was designed using  
222 a differential microelectromechanical pressure sensor 40 PC (Honeywell, Freeport, IL)  
223 connected to a 14-bit, 48 kilo samples per second data acquisition NI USB-6009 (National  
224 Instruments, Austin, TX), controlled by a proprietary software algorithm operating in Labview  
225 2017 (National Instruments) environment. A special algorithm was designed to compensate for  
226 aqueous humor volume displacement during *in vivo* pressure measurements. The device was  
227 assembled using microfluidic components (IDEX Health & Science, Oak Harbor, WA) with  
228 minimum dead volume. Before measurements, the remaining dead volume of the syringe was  
229 pre-filled with sterile water, thus minimizing air compressibility only within the micro-  
230 electromechanical cavity, which was co-evaluated by the software algorithm. To perform  
231 measurements, the needle was inserted into the anterior chamber of the eye through a temporal  
232 clear corneal puncture, adjacent to the limbus, and the needle was advanced approximately 5 mm  
233 toward the center of the chamber<sup>52</sup>.

234



235 ***In vivo* optical coherence tomography**

236 Posterior segment optical coherent tomography (OCT) was performed in anesthetized animals  
237 using the Heidelberg Spectralis (Heidelberg Engineering GmbH, Heidelberg, Germany). A  
238 speculum was used to retract the lids. Vertical and horizontal raster scans were performed to  
239 acquire images of the 4 retinal quadrants adjacent to the optic nerve (ON). Radial scans were  
240 performed to image the ON. Quantification of the retinal thickness was performed with image  
241 segmentation using ImageJ software version 1.43 or above (NIH, Bethesda, MD;  
242 <http://imagej.nih.gov/ij>). Thickness was measured from the borders of the ganglion cell layer to  
243 the outer nuclear layer. Six images of superior, inferior, temporal, and nasal retina were  
244 measured. Baseline images were compared to images obtained 50 days after subconjunctival  
245 injection.

246

247 **Retinal damage and cell death**

248 Cell death was assessed in tissue sections using terminal deoxynucleotidyl transferase-mediated  
249 dUTP nick- end labeling (TUNEL, Roche TUNEL kit (12156792910; Roche, Basel,  
250 Switzerland), as previously described<sup>50,52</sup>. Mounting medium with DAPI (Ultra- Cruz; sc-24941;  
251 Santa Cruz Biotechnology, Dallas, TX) was placed over the tissue, followed by a coverslip. Tile  
252 images were taken using an epifluorescent microscope (Zeiss Axio Imager M2; Zeiss,  
253 Oberkochen, Germany). DAPI signal (blue) was overlaid with Texas red (TUNEL+ cells) and  
254 quantified with ImageJ software version 1.43 or above (NIH, Bethesda, MD;  
255 <http://imagej.nih.gov/ij>) to assess the number of TUNEL+ cells overlapping with DAPI in the  
256 areas of interest. At least 3 different tissue sections per eye were analyzed, and data were  
257 presented as a percentage of the total DAPI area.

258

259 **Tissue preparation for H&E**

260 Eyes were enucleated at predetermined time points. The eyes were surgically dissected and fixed  
261 in 4% paraformaldehyde (PFA) (Sigma-Aldrich, St Louis, MO, USA) solution for 3 days at 4°C.  
262 Following fixation, eyes were sagittally dissected and half of the eye ball was embedded in

263 optimal cutting temperature (OCT) compound and flash-frozen, and the other half in glycol  
264 methacrylate. OCT embedded tissues were sectioned at 10  $\mu\text{m}$  thickness and glycol methacrylate  
265 embedded at 3  $\mu\text{m}$  and transferred to positively charged glass slides (Superfrost glass slides,  
266 Thermo Fisher, IL, USA). Hematoxylin/eosin (H&E) staining was performed for general  
267 histologic observation.

268

### 269 **Optic nerve evaluation with paraphenylenediamine staining**

270 Optic nerve axon degeneration was evaluated in explanted rabbit eyes using  
271 paraphenylenediamine staining (PPD). Optic nerves were dissected from the explanted eyes,  
272 fixed in Karnovsky fixative solution for 24 hours at 4°C, then processed and embedded in acrylic  
273 resin. Tissue cross sections (1  $\mu\text{m}$  thick) were stained with 1% PPD in absolute methanol. Each  
274 section was mounted onto a glass slide and imaged using a bright field microscope (Nikon  
275 eclipse E800 DIC; Tokyo, Japan) with a 100X objective lens. Tile images of the whole nerve  
276 section were obtained, and axon degeneration was quantified using ImageJ software, according  
277 to previous protocols<sup>52</sup>.

278

### 279 **Retinal neuroprotection**

280 The efficacy of subconjunctival anti-TNF- $\alpha$  administration in retinal neuroprotection was  
281 assessed using the aforementioned ocular burn injury model<sup>50,52</sup>. Immediately after the burn and  
282 lavage, the eye received subconjunctival injection of either infliximab (1, 10, or 100 mg) or  
283 adalimumab (0.4, 4, or 40 mg). Sterile saline (sham) subconjunctival injection (0.8 mL, n=3) was  
284 used as control. Additional controls included: subconjunctival injection of triamcinolone (20 mg,  
285 n=3). Retinal protection was assessed using TUNEL assay. Long-term efficacy of  
286 subconjunctival 4 mg adalimumab was assessed in rabbit eyes, 90 days after injury using retinal  
287 H&E and ON PPD staining.

288

### 289 **Statistical analysis**

290 Results were analyzed with the statistical package of social sciences (SPSS) Version 17.0  
291 (Statistical Package for the Social Sciences Inc., Chicago, IL, USA). The normality of  
292 continuous variables was assessed using the Kolmogorov-Smirnov test. Quantitative variables  
293 were expressed as mean  $\pm$  standard error of mean (SEM) and qualitative variables were  
294 expressed as frequencies and percentages. The Mann-Whitney test was used to assess differences  
295 between groups. All tests were two-tailed, and statistical significance was determined at  $p < 0.05$ .  
296 The independent student t-test was used to compare means between two groups, and pairwise t-  
297 test to compare changes within the same group. Analysis of variance (ANOVA) was used for  
298 comparisons of multiple groups. Alpha level correction was applied, as appropriate, for multiple  
299 comparisons.

300

## 301 **Results**

302 To assess toxicity, naive Dutch-Belted pigmented rabbits received subconjunctival injection of  
303 adalimumab (0.4, 4, 40 mg) or infliximab (1, 10, 100 mg) in one eye. All injections were  
304 uneventful. A conjunctival bleb was observed immediately after the injection of a higher dose of  
305 adalimumab (40 mg) or infliximab (100 mg), which resolved within a day (**Fig. 1 A-C**). No bleb  
306 was generated following injection of 4 mg adalimumab in 0.08 mL saline (**Fig. 1 D-F**). Fifty  
307 days after injection of the agents, all eyes looked normal, with intact corneal and conjunctival  
308 epithelium and lack of signs of inflammation or vascularization (**Fig. 1 C, F**).

309

310 Nor did subconjunctival injection of adalimumab or infliximab, at various doses, cause  
311 immediate or long-term intraocular pressure elevation, as assessed by intracameral manometry 7  
312 days before injection and 1, 3, 7, 28 and 50 days after injection (**Fig. 1 G**). A slight IOP elevation  
313 occurred only 7, 28, and 50 days after injection of sterile saline (sham group) but was not  
314 statistically significant (**Fig. 1 G**).

315

316 Additional evaluation was performed to assess potential retinal toxicity following  
317 subconjunctival injection of adalimumab (up to 40 mg) or infliximab (up to 100 mg). Dark-  
318 adapted and light-adapted electroretinography (ERG) were performed at baseline (7 days prior to  
319 injection) and 3, 7, 28, and 45 days post injection. Adalimumab and infliximab, at the highest

320 doses, did not cause appreciable changes, and ERG responses following flash stimulation with  
321 0.01, 3, or 10 cd.S/m<sup>2</sup> were similar between injected and un-injected contralateral eyes.  
322 Moreover, a and b wave amplitudes and time responses were statistically similar with saline  
323 injected eyes (**Supplemental figures 1, 2**).

324

325 *In vivo* histology was performed by using OCT imaging at baseline and 50 days after  
326 subconjunctival injection of adalimumab and infliximab. 4 mg of adalimumab did not cause  
327 changes in retinal thickness (**Fig. 2 A**), while high dose (40 mg) caused increase in superior  
328 retinal thickness ( $P < 0.05$ ) as compared to baseline measurements (**Fig. 2 B**). No retinal thickness  
329 changes were observed following 100 mg subconjunctival injection of infliximab (**Fig. 2 C**).  
330 Lower dose of adalimumab 0.4 or infliximab 1 and 10 mg likewise did not cause changes in  
331 retinal thickness measured by OCT.

332

333 Further toxicity assessment was performed by analyzing the optic nerve axons 50 days after  
334 subconjunctival injection of either 0.4, 4, 40 mg of adalimumab or 1, 10, 100 mg of infliximab.  
335 The results confirmed the safety of 4 mg adalimumab and the adverse effect of 40 mg  
336 adalimumab, which resulted in axonal degeneration and drop-out, as compared to the  
337 contralateral un-injected eye and control saline (sham) injected eye (**Fig. 2 A, B, D-F, H, I**).  
338 Infliximab 100 mg on the other hand did not cause optic nerve axonal degeneration/drop-out,  
339 consistent with the OCT retinal thickness measurements (**Fig. 2 C, G, J**).

340

341 The efficacy of subconjunctival injection of adalimumab and infliximab in acute retinal  
342 protection was evaluated 3 days after corneal burn. We have previously shown that corneal alkali  
343 burn causes acute uveal inflammation, release of TNF- $\alpha$ , and subsequent retinal cell apoptosis  
344 within 3 days in rabbits<sup>52</sup>. Indeed, saline treated (subconjunctival) rabbits exhibited peripheral  
345 and central retinal cell apoptosis within 3 days after the injury, extending in all 3 retinal layers  
346 (**Fig. 3 A, B, I**). In contrast, subconjunctival injection of infliximab 100 mg reduced retinal cell  
347 apoptosis (**Fig. 3 C, D, I**) but not as efficiently as subconjunctival adalimumab 4 mg, which  
348 provided complete protection to the retina (**Fig. 3 G, H, I, J**). Likewise, subconjunctival  
349 triamcinolone 20 mg was very protective (**Fig. 3 E, F, I, J**). In contrast, high dose (40 mg)

350 subconjunctival adalimumab was toxic and caused retinal cell apoptosis instead of retinal  
351 protection (compared to sham control) (**Fig. 3 I, J**).

352

353 The long-term efficacy of subconjunctival 4 mg adalimumab in retinal and optic nerve protection  
354 was evaluated in a separate study, by evaluating the retina and optic nerve 90 days after corneal  
355 burn. A single subconjunctival injection of 4 mg adalimumab after the injury was able to prevent  
356 retinal ganglion cells loss and change in retinal thickness, as compared to saline treatment that  
357 exhibited significant loss in RGCs and increase in retinal thickness (**Fig. 4 A-D**). Moreover,  
358 analysis of the optic nerve axons confirmed the above results, showing that 4 mg adalimumab  
359 was able to preserve 92% of the ON axons at 90 days, as compared to saline treatment which  
360 exhibited almost 50% axonal loss (**Fig. 4 E-G**).

361

362 Expected retinal bioavailability of adalimumab after subconjunctival administration has been  
363 roughly estimated computationally. It is known that about 0.06% of a hydrophilic compound  
364 (Gd-DTPA) permeates to the rabbit retina after subconjunctival injection<sup>66</sup>. Similar results were  
365 obtained by computational simulation of protein drug permeation from the subconjunctival space  
366 to the retina and vitreous (i.e. 0.1–1% of the dose; fraction of 0.001-0.01)<sup>67</sup>. This estimate takes  
367 into account permeability in the sclera, choroid, and RPE as well as drug loss to the conjunctival  
368 and choroidal blood flows. Average retinal adalimumab concentration after subconjunctival  
369 injection can be estimated using equation:

370

$$371 \quad C_{ss,av} = (F_{ret} \times D_{sc}) / (\tau \times CL_{ret})$$

372

373 where  $F_{ret}$  (retinal bioavailability) = 0.001-0.01,  $D_{sc}$  (subconjunctival dose) = 4 mg,  $\tau$  (follow-up  
374 period after the dose) = 72 h (Fig. 5), and  $CL_{ret}$  (clearance from the retina/vitreous humor  
375 compartment) = 0.066 ml/h<sup>68</sup>. Therefore, adalimumab (4 mg; molecular weight 144,190 g/mol)  
376 concentration in the retina/vitreous compartment is expected to be 0.8-8  $\mu$ g/ml (5.8-58 nM);  
377 about  $10^3$ - $10^4$  times higher than its affinity ( $K_d = 8.6$  pM) to soluble TNF- $\alpha$ <sup>69</sup>, and 10-100 times  
378 higher than adalimumab affinity towards membrane bound TNF- $\alpha$  ( $K_d = 468$  pM). Thus, it is  
379 likely that direct permeation of adalimumab from the subconjunctival space to the retina results  
380 in therapeutic activity in the retina.

381

382 It is known that substantial systemic drug absorption takes place from the subconjunctival  
383 injection site. Experimental data<sup>70</sup> and computational follow-up analysis<sup>67</sup> suggest systemic  
384 absorption of 72–83% for large molecules. Then, average steady-state concentration of  
385 adalimumab ( $C_{ss,av}$ ) in human plasma and adalimumab quantity entering retina during 72 hours  
386 can be estimated as

387

$$388 \quad Q_{ret} = P_{RPE} \times S_{RPE} \times C_{ss,av} \times t = P_{RPE} \times S_{RPE} (F \times D_{sc}) / (\tau \times CL) \times t$$

389

390 where  $P_{RPE} = 0.035 \times 10^{-6}$  cm/s (RPE permeability of bevacizumab from)<sup>71</sup>,  $S_{RPE} = 12$  cm<sup>2</sup> (area  
391 of human RPE)<sup>72</sup>,  $F = 0.72$ ,  $D_{sc} = 4$  mg,  $\tau = 72$  h,  $CL$  (plasma clearance) = 12 ml/h<sup>73</sup> and  $t = 72$  h.  
392 Average concentration in plasma is calculated to be  $\approx 3.2$  mg/L (22 nM) resulting in distribution  
393 of  $\approx 0.35$   $\mu$ g of adalimumab across the RPE into the retinal compartment within 72 hours.  
394 Permeation of proteins across the blood retinal barrier is slow<sup>74</sup> and the result (0.35  $\mu$ g) is about  
395 0.01% of the subconjunctival dose. *Therefore, we conclude that direct permeation of*  
396 *adalimumab across the ocular tissues to the retina represents about 10-100 higher*  
397 *bioavailability ( $\approx 0.1$ –1%) than its retinal entry via systemic blood circulation ( $\approx 0.01$ %).*

398

399 (In a very recent rabbit study, the development of a thermosensitive biodegradable slow-release  
400 DDS was reported. Using this device loaded with 2 mg infliximab reduced the axon loss after  
401 alkali burn to the cornea 3 months earlier, from about 50% (n=4) to about 8% (n=3) [Zhou et  
402 al<sup>75</sup>]—thus very similar to what is reported in this paper.)

403

## 404 **Discussion**

405 The inflammatory cytokine TNF- $\alpha$  seems to be playing a major role in the triggering of the optic  
406 neuropathy after acute traumatic events in the eye<sup>50,63</sup>. Most likely other inflammatory cytokines  
407 are involved as well, especially IL-6 and IL-1 $\beta$ <sup>52</sup>, but the role of TNF- $\alpha$  in glaucoma has been  
408 under strong suspicion for over two decades<sup>76,77</sup>. Development of monoclonal antibodies have  
409 helped to pinpoint the role of this cytokine in the process. Thus, it has been previously shown in  
410 animals that ganglion cell death after short exposure to high intraocular pressure, can be blocked

Updated 10-08-2022

411 by etanercept, a TNF- $\alpha$  antibody<sup>63</sup>. In the likely IOP-independent, inflammatory and rapid  
412 pathway described by us in animals, infliximab and adalimumab similarly show a high level of  
413 ganglion cell protection<sup>50,52</sup>. Whether these seemingly separate pathophysiological pathways to  
414 optic nerve damage (IOP-independent and IOP-triggered) are truly separate or merge into one,  
415 remains to be determined.

416

417 When interpreting the results on past alkali burn or corneal surgery experiments, the timing of  
418 events is important. Thus, the TUNEL staining of the retinal ganglion cell apoptosis performed 3  
419 days after the corneal burn, should reflect only the initial, rapid, seemingly IOP-independent  
420 events, whereas the optic nerve degeneration after 50 days (in earlier experiments 90 days<sup>52</sup>)  
421 might reflect not only this first phase but also on the second, IOP-related phase during the  
422 healing process (increased outflow resistance, etc.). Under any circumstances, both phases might  
423 be blocked with prompt delivery of TNF- $\alpha$  inhibitors already on the market, and this therapeutic  
424 possibility deserves to be subjected to further evaluation. Here we have tried to identify efficacy,  
425 toxicity, and optimal tissue for administration.

426

427 Potential toxicity of TNF- $\alpha$  antibodies to the retina received attention already two decades ago,  
428 triggered by the introduction of the intravitreal route of administration to target wet macular  
429 degeneration. Thus, in one such rabbit study, *intravitreal* adalimumab did not appear toxic in  
430 concentrations of 0.5 or 5 mg<sup>78</sup>—these results being pertinent here. Infliximab was tested  
431 intravitreally in a similar rabbit study and was found to be non-toxic in doses up to 2.0 mg<sup>79</sup>.  
432 Likewise, intravitreal infliximab was found safe in another rabbit study at a dose of up to 1.7  
433 mg<sup>80</sup>. However significant toxicity has been encountered in humans after intravitreal injection of  
434 infliximab with doses of 0.5–2.0 mg, which underscores the possible importance of species  
435 differences<sup>81-83</sup>.

436

437 Not only biologics but also corticosteroids are neuroprotective against acute ganglion cell  
438 apoptosis and should be useful drugs in this respect. In our experiments in animals the short-  
439 acting dexamethasone, for unknown reasons, showed less efficacy than the more long-acting  
440 Kenalog® preparation of triamcinolone, in clinically most used concentrations<sup>52</sup>. However, the  
441 well-known complications of local corticosteroids, particularly their suppressive effect on

Updated 10-08-2022

442 corneal wound healing, limit their use post events to modest concentrations or short duration.  
443 Toxicity of steroids has also been previously studied in intravitreal rabbit experiments; 0.5 mg or  
444 1.0 mg triamcinolone into the vitreous did not produce morphological changes in the retina but  
445 4.0 mg, 8.0 mg, and 20 mg produced toxic effects in the outer retina<sup>83</sup>. Another study on  
446 intravitreal triamcinolone confirmed that 4.0 mg was retinotoxic and suggested that the vehicle  
447 was to blame<sup>84</sup>.

448

449 It is difficult to compare the results from these toxicology studies with the outcomes from our  
450 subconjunctival administrations, but they seem grossly compatible with our findings of a single  
451 injection of 4.0 mg adalimumab being well-tolerated subconjunctivally, but 40 mg is not. The  
452 computerized exercise on bioavailability (see under Results) supports the intuitive assumption  
453 that a lower dose of 4.0 mg adalimumab to the eye would have less systemic toxicity than a  
454 subcutaneous injection of 40.0 mg of the same drug.

455

456 Not only severe trauma but also less invasive standard corneal surgery (PK, KPro, laceration  
457 etc.) can lead to some rapid upregulation of TNF- $\alpha$  in the eye and ganglion cell apoptosis, which  
458 may, at least in part, be the cause of subsequent secondary glaucoma<sup>85</sup>. Even though such routine  
459 surgery rarely triggers as much inflammation as severe trauma, it makes sense to apply similar  
460 prophylactic principles as long as the patients are suspected to be at risk.

461

462 The clinical implications of the combined clinical experience in the past and more recent animal  
463 experiments point to the need for heavier and more sustained anti-inflammatory medication than  
464 is presently practiced after acute ocular trauma or routine surgery. Emphasis should be on very  
465 prompt delivery after the acute event, with administration of the drug to an easily accessible part  
466 of the eye but where it can reliably protect the retinal ganglion cells—pointing to subconjunctival  
467 application as practical and relatively safe. A more detailed pharmacokinetic study on the  
468 relative efficacy of various routes of administration of TNF- $\alpha$  inhibitors was beyond the scope of  
469 this investigation, however, one may cautiously draw some analogies from work on  
470 bevacizumab, the full-length monoclonal antibody against vascular endothelial growth factor  
471 (VEGF). Intravitreal injection was by far the most effective route of administration for retinal  
472 delivery but subconjunctival injection was sufficient and should be less dangerous in a more



473 primitive clinical setting. Both pathways resulted in similar systemic exposure, with the  
474 subconjunctival route better targeting the cornea<sup>86</sup>. Thus, a subconjunctival injection of anti-  
475 TNF- $\alpha$  drugs would be safer and more practical than intravitreal injection for a corneal surgeon,  
476 and would also be effective against corneal complications.

477  
478 A limitation of this study should include the fact that the alkali burn rabbit model used in this  
479 paper resulted in a lower percentage of affected ganglion cell than in the mice model used in  
480 many previous studies. This seems to be attributed to ocular size differences between models.  
481 Also, the number of animals used had to be kept low due to the great expense of the biologics  
482 used. However, all critical data have been at least in triplicate.

483  
484 On the positive side, the low level of toxicity of adalimumab corroborates previous findings.  
485 Also, the substantial protective effect on the retinal cells by the biologics and the steroids, in  
486 various concentrations, is very high, very persuasive (Fig. 4). Thus, particularly 4 mg  
487 adalimumab subconjunctivally seems to suppress apoptosis almost completely (and be locally  
488 seemingly non-toxic). Subconjunctival injection of 20 mg triamcinolone as Kenalog® also seems  
489 very protective in the rapid, IOP-independent pathway. Particularly encouraging are the more  
490 final 3 months results on both ganglion cells and nerve axons. Based on the results of these and  
491 earlier animal experiments, it seems reasonable to initiate human studies with biologic low-risk  
492 anti-inflammatory regimens following corneal surgery or unexpected trauma. In support, we  
493 have already shown in patients that infliximab can have a dramatic effect in preventing corneal  
494 tissue melt around a keratoprosthesis<sup>49</sup>. Also, FDA has approved the successful use of  
495 subcutaneous adalimumab in non-infectious uveitis. A pilot clinical study on the protective  
496 effects on the eye should be the next logical step.

497  
498 **Significance statement:** This study demonstrates that low dose (4 mg) subconjunctival  
499 administration of the TNF- $\alpha$  antibody adalimumab can be safe and very effective in protecting  
500 against retinal damage in a rabbit model. This suggests the possibility of using this inhibitor as  
501 prophylaxis against late secondary glaucoma, with minimal systemic risk for the patient.

502  
503 **Acknowledgements:** The authors thank Leonard Levin, MD, PhD, for valuable advice.

504 **Bibliography**

- 505 1. Becker B, Shaffer RN. Classification of the glaucomas. In: *Diagnosis and Therapy of the*  
506 *Glaucomas*, St. Louis: Mosby. 1961:15-20.  
507
- 508 2. Weinreb RN, Aung T, Medeiros FA. The pathophysiology and treatment of glaucoma: a  
509 review. *JAMA*. 2014; 311:1901-1911.  
510
- 511 3. Quigley HA. Neuronal death in glaucoma. *Prog Retin Eye Res*. 1999; 18:39-57.  
512
- 513 4. Quigley, HA, Broman AT. The number of people with glaucoma worldwide in 2010 and 2020. *Br J*  
514 *Ophthalmol*. 2006; 90:262-267.  
515
- 516 5. Kuckelkorn R, Keller GK, Redbrake C. [Glaucoma after extremely severe chemical and  
517 thermal eye burns. Surgical possibilities]. *Ophthalmologe*. 2001; 98:1149-1156.  
518
- 519 6. Tsai JH, Derby E, Holland EJ, Khatana AK. Incidence and prevalence of glaucoma in severe  
520 ocular surface disease. *Cornea*. 2006; 25:530-532.  
521
- 522 7. Lin MP, Eksioglu U, Mudumbai RC, Slabaugh MA, Chen PP. Glaucoma in patients with  
523 ocular chemical burns. *Am J Ophthalmol*. 2012; 154:481-485.  
524
- 525 8. Dohlman CH, Robert MC, Paschalis EI. Treatment of Chemical Burn to the Eye: A  
526 Changing Picture. In: Kathryn Colby, Reza Dana eds. *Foundations of Corneal Disease: Past,*  
527 *Present and Future*, Denver, CO: Springer International Publishing. 2020:109-119.  
528
- 529 9. Irvine, AR and Kaufman, HE. Intraocular pressure following penetrating keratoplasty. *Am J*  
530 *Ophthalmol*. 1969; 68(5): 835-44.  
531
- 532 10. Thoft RA, Gordon JM, Dohlman CH. Glaucoma following keratoplasty. *Trans Am Acad*  
533 *Ophthalmol Otolaryngol*. 1974; 78:352-364.  
534
- 535 11. Foulks, GN. Glaucoma associated with penetrating keratoplasty. *Ophthalmology*. 1987; 94(7): 871-  
536 4.  
537
- 538 12. Ayyala RS. Penetrating keratoplasty and glaucoma. *Surv Ophthalmol*. 2000; 45:91-105.  
539
- 540 13. Aldave AJ, Rudd JC, Cohen EJ, Rapuano CJ, Laibson PR. The role of glaucoma therapy in  
541 the need for repeat penetrating keratoplasty. *Cornea*. 2000; 19:772-776.  
542
- 543 14. Rumelt S, Bersudsky V, Blum-Hareuveni T, Rehany U. Preexisting and postoperative  
544 glaucoma in repeated corneal transplantation. *Cornea*. 2002; 21:759-765.

- 545  
546 15. Al-Mahmood AM, Al-Swailem SA, Edward DP. Glaucoma and corneal transplant  
547 procedures. *J Ophthalmol.* 2012; 2012:576394.  
548  
549 16. Haddadin RI, Chodosh J. Corneal transplantation and glaucoma. *Semin Ophthalmol.* 2014;  
550 29:380-396.  
551  
552 17. Wu S, Xu J. Incidence and risk factors for post-penetrating keratoplasty glaucoma: A  
553 systematic review and meta-analysis. *PLoS One.* 2017; 12:e0176261.  
554  
555 18. Baltaziak M, Chew HF, Podbielski DW, Ahmed IIK. Glaucoma after corneal replacement.  
556 *Surv Ophthalmol.* 2018; 63:135-148.  
557  
558 19. Liesenborghs I, Schouten J, Berendschot T, Beckers HJM, Nuijts R, Visser N, Webers CAB.  
559 Risk factors for the development of ocular hypertension after keratoplasty: A systematic  
560 review. *Cornea.* 2020; 39:394-402.  
561  
562 20. Netland PA, Terada H, Dohlman CH. Glaucoma associated with keratoprosthesis.  
563 *Ophthalmology.* 1998; 105:751-757.  
564  
565 21. Yaghouti F, Nouri M, Abad JC, Power WJ, Doane MG, Dohlman CH. Keratoprosthesis:  
566 preoperative prognostic categories. *Cornea.* 2001; 20:19-23.  
567  
568 22. Harissi-Dagher M, Dohlman CH. The Boston Keratoprosthesis in severe ocular trauma. *Can*  
569 *J Ophthalmol.* 2008; 43:165-169.  
570  
571 23. Cade F, Grosskreutz CL, Tauber A, Dohlman CH. Glaucoma in eyes with severe chemical  
572 burn, before and after keratoprosthesis. *Cornea.* 2011; 30:1322-1327.  
573  
574 24. Crnej A, Paschalis EI, Salvador-Culla B, Tauber A, Drnovsek-Olup B, Shen LQ, Dohlman  
575 CH. Glaucoma progression and role of glaucoma surgery in patients with Boston  
576 keratoprosthesis. *Cornea.* 2014; 33:349-354.  
577  
578 25. Kumar RS, Tan DT, Por YM, Oen FT, Hoh ST, Parthasarathy A, Aung T. Glaucoma  
579 management in patients with osteo-odonto-keratoprosthesis (OOKP): the Singapore OOKP  
580 Study. *J Glaucoma.* 2009; 18:354-360.  
581  
582 26. Kamyar R, Weizer JS, de Paula FH, Stein JD, Moroi SE, John D, Musch DC, Mian SI.  
583 Glaucoma associated with Boston type I keratoprosthesis. *Cornea.* 2012; 31:134-139.  
584

- 585 27. Talajic JC, Agoumi Y, Gagne S, Moussally K, Harissi-Dagher M. Prevalence, progression,  
586 and impact of glaucoma on vision after Boston type 1 keratoprosthesis surgery. *Am J*  
587 *Ophthalmol.* 2012; 153:267-274.e261.  
588
- 589 28. Iyer G, Srinivasan B, Agarwal S, Shetty R, Krishnamoorthy S, Balekudaru S, Vijaya L.  
590 Glaucoma in modified osteo-odonto-keratoprosthesis eyes: role of additional stage 1A and  
591 Ahmed glaucoma drainage device-technique and timing. *Am J Ophthalmol.* 2015; 159:482-  
592 489.  
593
- 594 29. Ali MH, Dikopf MS, Finder AG, Aref AA, Vajaranant T, de la Cruz J, Cortina MS.  
595 Assessment of Glaucomatous Damage After Boston Keratoprosthesis Implantation Based on  
596 Digital Planimetric Quantification of Visual Fields and Optic Nerve Head Imaging. *Cornea.*  
597 2018; 37:602-608.  
598
- 599 30. Geoffrion D, Harissi-Dagher M. Glaucoma Risk Factors and Outcomes Following Boston  
600 Keratoprosthesis Type 1 Surgery. *Am J Ophthalmol.* 2021; 226:56-67.  
601
- 602 31. Dubey S, Jain K, Mukherjee S, Sharma N, Pegu J, Gandhi M, Bhoot M. Current profile of  
603 secondary glaucoma in a Northern India tertiary eye care hospital. *Ophthalmic Epidemiol.*  
604 2019; 26:200-207.  
605
- 606 32. Gong H, Ren J, Zheng B, Huang X, Liao Y, Zhou Y, Lin M. The Profile of Secondary  
607 Glaucoma in China: A Study of Over 10,000 Patients. *J Glaucoma.* 2021; 30:895-901.  
608
- 609 33. Suleiman, Y, Amm, M, Duncker, GIW, and Nölle, B. Prognose von Korneatransplantationen  
610 nach Bulbusperforation. *Klin Monbl Augenheilkd.* 2004; 221: 658-673.  
611
- 612 34. Li, KX, Durrani, AF, Zhou, Y, Zhao, PY, Tannen, BL, Mian, SI, Musch, DC, and Zacks,  
613 DN. Outcomes of Penetrating Keratoplasty After Open Globe Injury. *Cornea.* 2021. doi:  
614 10.1097/ico.0000000000002918. Online ahead of print.  
615
- 616 35. Doren, GS, Cohen, EJ, Brady, SE, Arentsen, JJ, and Laibson, PR. Penetrating keratoplasty  
617 after ocular trauma. *Am J Ophthalmol.* 1990; 110: 408-11.  
618
- 619 36. Dana, MR, Moyes, AL, Gomes, JA, Rosheim, KM, Schaumberg, DA, Laibson, PR, Holland,  
620 EJ, Sugar, A, and Sugar, J. The indications for and outcome in pediatric keratoplasty. A  
621 multicenter study. *Ophthalmology.* 1995; 102(8): 1129-38.  
622
- 623 37. World Health Organization, 2004. *International Statistical Classification of Diseases and*  
624 *Related Health Problems: Alphabetical index* (Vol. 3). World Health Organization.

- 625  
626 38. Quigley, HA, Dunkelberger, GR, and Green, WR. Retinal ganglion cell atrophy correlated  
627 with automated perimetry in human eyes with glaucoma. *Am J Ophthalmol*. 1989; 107(5): 453-  
628 464.  
629
- 630 39. Williams, PA, Marsh-Armstrong, N, and Howell, GR. Neuroinflammation in glaucoma: A new  
631 opportunity. *Exp Eye Res*. 2017; 157: 20-27.  
632
- 633 40. Wiggs, JL. Glaucoma Genes and Mechanisms. *Prog Mol Biol Transl Sci*. 2015; 134: 315-342.  
634
- 635 41. Wei X, Cho KS, Thee EF, Jager MJ, Chen DF. Neuroinflammation and microglia in glaucoma: time  
636 for a paradigm shift. *J Neurosci Res*. 2019; 97:70-76.  
637
- 638 42. Mélik Parsadaniantz S, Réaux-le Goazigo A, Sapienza A, Habas C, Baudouin C. Glaucoma: A  
639 Degenerative Optic Neuropathy Related to Neuroinflammation? *Cells*. 2020; 9(3).  
640
- 641 43. Dohlman JG, Foster CS, Dohlman CH. Boston Keratoprosthesis in Stevens-Johnson  
642 syndrome: a case of using infliximab to prevent tissue necrosis. *Digit J Ophthalmol*. 2009;  
643 15:5-8.  
644
- 645 44. Dohlman, CH, Cade, F, Regatieri, CV, Zhou, C, Lei, F, Crnej, A, Harissi-Dagher, M, Robert,  
646 MC, Papaliodis, GN, Chen, D, Aquavella, JV, Akpek, EK, Aldave, AJ, Sippel, KC,  
647 D'Amico, DJ, Dohlman, JG, Fagerholm, P, Wang, L, Shen, LQ, González-Andrades, M,  
648 Chodosh, J, Kenyon, KR, Foster, CS, Pineda, R, Melki, S, Colby, KA, Ciolino, JB, Vavvas,  
649 DG, Kinoshita, S, Dana, R, and Paschalis, EI. Chemical Burns of the Eye: The Role of  
650 Retinal Injury and New Therapeutic Possibilities. *Cornea*. 2018; 37(2): 248-251.  
651
- 652 45. Harwerth RS, Carter-Dawson L, Smith EL, 3rd, Barnes G, Holt WF, Crawford ML. Neural  
653 losses correlated with visual losses in clinical perimetry. *Invest Ophthalmol Vis Sci*. 2004;  
654 45:3152-3160.  
655
- 656 46. Dohlman CH, Dudenhofer EJ, Khan BF, Dohlman JG. Corneal blindness from end-stage  
657 Sjögren's Syndrome and graft-versus-host disease. In: Sullivan DA, Stern ME, Tsubota K,  
658 Dartt DA, Sullivan RM, Bromberg BB eds. *Lacrimal Gland, Tear Film, and Dry Eye*  
659 *Syndromes 3: Basic Science and Clinical Relevance Part B*, Boston: Springer. 2002:1335-  
660 1338.  
661
- 662 47. Ciralsky J, Papaliodis GN, Foster CS, Dohlman CH, Chodosh J. Keratoprosthesis in  
663 autoimmune disease. *Ocul Immunol Inflamm*. 2010; 18:275-280.  
664
- 665 48. Robert MC, Črnej A, Shen LQ, Papaliodis GN, Dana R, Foster CS, Chodosh J, Dohlman CH.

- 666           Infliximab after Boston Keratoprosthesis in Stevens-Johnson Syndrome: An Update. *Ocul*  
667           *Immunol Inflamm.* 2017; 25:413-417.
- 668
- 669 49. Dohlman CH. The Boston Keratoprosthesis—the first 50 years. Some reminiscences. *Annu*  
670           *Rev Vis Sci.* 2022. in press
- 671
- 672 50. Cade F, Paschalis EI, Regatieri CV, Vavvas DG, Dana R, Dohlman CH. Alkali burn to the  
673           eye: protection using TNF-alpha inhibition. *Cornea.* 2014; 33:382-389.
- 674
- 675 51. Crnej A, Omoto M, Dohlman TH, Gonzalez-Andrades M, Paschalis EI, Cruzat A, Vu TH,  
676           Doorenbos M, Chen DF, Dohlman CH, Dana R. Effect of Penetrating Keratoplasty and  
677           Keratoprosthesis Implantation on the Posterior Segment of the Eye. *Invest Ophthalmol Vis*  
678           *Sci.* 2016; 57:1643-1648.
- 679
- 680 52. Paschalis, EI, Zhou, C, Lei, F, Scott, N, Kapoulea, V, Robert, MC, Vavvas, D, Dana, R,  
681           Chodosh, J, and Dohlman, CH. Mechanisms of Retinal Damage after Ocular Alkali Burns.  
682           *Am J Pathol.* 2017; 187(6): 1327-1342.
- 683
- 684 53. Paschalis EI, Taniguchi EV, Chodosh J, Pasquale LR, Colby K, Dohlman CH, Shen LQ.  
685           Blood Levels of Tumor Necrosis Factor Alpha and Its Type 2 Receptor Are Elevated in  
686           Patients with Boston Type I Keratoprosthesis. *Curr Eye Res.* 2019; 44:599-606.
- 687
- 688 59. Miyamoto F, Sotozono C, Ikeda T, Kinoshita S. Retinal cytokine response in mouse alkali-  
689           burned eye. *Ophthalmic Res.* 1998; 30:168-171.
- 690
- 691 60. Kompa S, Redbrake C, Hilgers C, Wüstemeyer H, Schrage N, Remky A. Effect of different  
692           irrigating solutions on aqueous humour pH changes, intraocular pressure and histological  
693           findings after induced alkali burns. *Acta Ophthalmol Scand.* 2005; 83:467-470.
- 694
- 695 61. Dohlman CH, Zhou C, Lei F, Cade F, Regatieri CV, Crnej A, Dohlman JG, Shen LQ,  
696           Paschalis EI. Glaucoma After Corneal Trauma or Surgery-A Rapid, Inflammatory, IOP-  
697           Independent Pathway. *Cornea.* 2019; 38:1589-1594.
- 698
- 699 62. Huang, Y, Yuan, M, Duan, F, Yang, Y, Lou, B, and Lin, X. Inhibition of endoplasmic  
700           reticulum stress by 4-phenylbutyrate alleviates retinal inflammation and the apoptosis of  
701           retinal ganglion cells after ocular alkali burn in mice. *Inflamm Res.* 2022. doi:  
702           10.1007/s00011-022-01565-3. Online ahead of print.
- 703
- 704 63. Roh, M, Zhang, Y, Murakami, Y, Thanos, A, Lee, SC, Vavvas, DG, Benowitz, LI, and  
705           Miller, JW. Etanercept, a widely used inhibitor of tumor necrosis factor-alpha (TNF-alpha),

- 706 prevents retinal ganglion cell loss in a rat model of glaucoma. *PLoS One*. 2012; 7(7): e40065.  
707
- 708 64. Robert, MC, Frenette, M, Zhou, C, Yan, Y, Chodosh, J, Jakobiec, FA, Stagner, AM, Vavvas,  
709 D, Dohlman, CH, and Paschalis, EI. A Drug Delivery System for Administration of Anti-  
710 TNF-alpha Antibody. *Transl Vis Sci Technol*. 2016; 5:11.  
711
- 712 65. Zhou C, Robert MC, Kapoulea V, Lei F, Stagner AM, Jakobiec FA, Dohlman CH, Paschalis  
713 EI. Sustained Subconjunctival Delivery of Infliximab Protects the Cornea and Retina  
714 Following Alkali Burn to the Eye. *Invest Ophthalmol Vis Sci*. 2017; 58:96-105.  
715
- 716 66. Kim, H, Robinson, MR, Lizak, MJ, Tansey, G, Lutz, RJ, Yuan, P, Wang, NS, and Csaky,  
717 KG. Controlled drug release from an ocular implant: an evaluation using dynamic three-  
718 dimensional magnetic resonance imaging. *Invest Ophthalmol Vis Sci*. 2004; 45: 2722-31.  
719
- 720 67. Ranta, VP, Mannermaa, E, Lummeppuro, K, Subrizi, A, Laukkanen, A, Antopolsky, M,  
721 Murtomäki, L, Hornof, M, and Urtti, A. Barrier analysis of periocular drug delivery to the  
722 posterior segment. *J Control Release*. 2010; 148(1): 42-48.  
723
- 724 68. Subrizi, A, Del Amo, EM, Korzhikov-Vlakh, V, Tennikova, T, Ruponen, M, and Urtti, A.  
725 Design principles of ocular drug delivery systems: importance of drug payload, release rate,  
726 and material properties. *Drug Discov Today*. 2019; 24(8): 1446-1457.  
727
- 728 69. Kaymakcalan, Z, Sakorafas, P, Bose, S, Scesney, S, Xiong, L, Hanzatian, DK, Salfeld, J, and  
729 Sasso, EH. Comparisons of affinities, avidities, and complement activation of adalimumab,  
730 infliximab, and etanercept in binding to soluble and membrane tumor necrosis factor. *Clin*  
731 *Immunol*. 2009; 131(2): 308-16.  
732
- 733 70. Kim, SH, Csaky, KG, Wang, NS, and Lutz, RJ. Drug elimination kinetics following  
734 subconjunctival injection using dynamic contrast-enhanced magnetic resonance imaging.  
735 *Pharm Res*. 2008; 25(3): 512-20.  
736
- 737 71. Ramsay, E, Hagström, M, Vellonen, KS, Boman, S, Toropainen, E, Del Amo, EM, Kidron,  
738 H, Urtti, A, and Ruponen, M. Role of retinal pigment epithelium permeability in drug  
739 transfer between posterior eye segment and systemic blood circulation. *Eur J Pharm*  
740 *Biopharm*. 2019; 143: 18-23.  
741
- 742 72. Panda-Jonas, S, Jonas, JB, Jakobczyk, M, and Schneider, U. Retinal photoreceptor count,  
743 retinal surface area, and optic disc size in normal human eyes. *Ophthalmology*. 1994; 101(3):  
744 519-23.  
745

- 746 73. Mascelli, MA, Zhou, H, Sweet, R, Getsy, J, Davis, HM, Graham, M, and Abernethy, D.  
747 Molecular, biologic, and pharmacokinetic properties of monoclonal antibodies: impact of  
748 these parameters on early clinical development. *J Clin Pharmacol.* 2007; 47(5): 553-65.  
749
- 750 74. Vellonen, KS, Soini, EM, Del Amo, EM, and Urtti, A. Prediction of Ocular Drug  
751 Distribution from Systemic Blood Circulation. *Mol Pharm.* 2016; 13(9): 2906-11.  
752
- 753 75. Zhou C, Hui PC, Wolkow N, Dohlman CH, Vavvas DG, Paschalis EI. Corneal and retinal  
754 protection using a novel slow-release injectable anti-TNF- $\alpha$ /anti-VEGF drug delivery  
755 system. *Invest Ophthalmol Vis Sci.* 2021; ARVO Abstract 3546816.  
756
- 757 76. Madigan MC, Sadun AA, Rao NS, Dugel PU, Tenhula WN, Gill PS. Tumor necrosis factor-  
758 alpha (TNF-alpha)-induced optic neuropathy in rabbits. *Neurol Res.* 1996; 18(2):176-184.  
759
- 760 77. Yuan, L and Neufeld, AH. Tumor necrosis factor-alpha: a potentially neurodestructive  
761 cytokine produced by glia in the human glaucomatous optic nerve head. *Glia.* 2000; 32(1):  
762 42-50.  
763
- 764 78. Tsilimbaris M, Diakonis VF, Naoumidi I, Charisis S, Kritikos I, Chatzithanasis G, Papadaki  
765 T, Plainis S. Evaluation of potential retinal toxicity of adalimumab (Humira). *Graefes Arch  
766 Clin Exp Ophthalmol.* 2009; 247(8):1119-1125.  
767
- 768 79. Theodossiadis PG, Liarakos VS, Sfrikakis PP, Charonis A, Agrogiannis G, Kavantzas N,  
769 Vergados IA. Intravitreal administration of the anti-TNF monoclonal antibody infliximab in  
770 the rabbit. *Graefes Arch Clin Exp Ophthalmol.* 2009; 247(2):273-281.  
771
- 772 80. Giansanti F, Ramazzotti M, Vannozzi L, Rapizzi E, Fiore T, Iaccheri B, Degl' Innocenti D,  
773 Moncini D, Menchini U. A pilot study on ocular safety of intravitreal infliximab in a rabbit  
774 model. *Invest Ophthalmol Vis Sci.* 2008; 49(3):1151-1156.  
775
- 776 81. Rosenfeld PJ, Goodman KW. When is off-label drug use in the patient's best interest? *Am J  
777 Ophthalmol.* 2009; 147(5):761-763.  
778
- 779 82. Giganti M, Beer PM, Lemanski N, Hartman C, Schartman J, Falk N. Adverse events after  
780 intravitreal infliximab (Remicade). *Retina.* 2010; 30(1):71-80.  
781
- 782 83. Yu SY, Damico FM, Viola F, D'Amico DJ, Young LH. Retinal toxicity of intravitreal  
783 triamcinolone acetonide: a morphological study. *Retina.* 2006; 26(5):531-536.  
784
- 785 84. Lang Y, Zemel E, Miller B, Perlman I. Retinal toxicity of intravitreal kenalog in albino



786 rabbits. *Retina*. 2007; 27(6):778-788.

787

788 85. Chen X, Lei F, Zhou C, Chodosh J, Wang L, Huang Y, Dohlman CH, Paschalis EI.

789 Glaucoma after Ocular Surgery or Trauma: The Role of Infiltrating Monocytes and Their  
790 Response to Cytokine Inhibitors. *Am J Pathol*. 2020; 190(10):2056-2066.

791

792 86. Nomoto H, Shiraga F, Kuno N, Kimura E, Fujii S, Shinomiya K, Nugent AK, Hirooka K,  
793 Baba T. Pharmacokinetics of bevacizumab after topical, subconjunctival, and intravitreal  
794 administration in rabbits. *Invest Ophthalmol Vis Sci*. 2009; 50(10):4807-4813.

795

796

797

798

799

800

801

802

803

804

805

806

807

808

809

810

811

812

813

814

815

816

817

818

819

820

821

822

823

824

825

826

827

828

829 **Figures and Legends**

830 **Figure 1. Toxicity: Subconjunctival injection of infliximab and adalimumab in normal**  
831 **eyes.**

832 **(A)** Photograph of subconjunctival injection of **100 mg infliximab (0.8 ml)** showing elevation of  
833 the superior and inferior conjunctiva immediately after the injection as the volume was  
834 distributed equally in the superior and inferior conjunctiva. **(B)** The same eye the following day  
835 showing lack of bleb and **(C)** at 50 days with normal appearance. **(D)** Photograph of the superior  
836 subconjunctiva after injection of **4 mg adalimumab (0.08 ml)**. No elevation of the conjunctiva is  
837 evident immediately after the injection. **(E - F)** Normal appearance of the eye at day one and 50  
838 days post injection.

839 **(G)** Longitudinal intraocular pressure measurements using cannulation in eyes injected  
840 subconjunctivally with either 1, 10, or 100 mg of infliximab or 0.4, 4, or 40 mg of adalimumab.  
841 No IOP elevation is evident up to 50 days post injection. A slight elevation was observed in the  
842 saline (sham) injected eyes at day 28 and 50, which did not reach statistical significance.

843

844

845

846

847

848

849

850

851

852

853

854

855

856

857

858

859

Updated 10-08-2022

860 **Figure 2. Toxicity: Retinal and optic nerve histology, 50 days after subconjunctival**  
861 **administration of adalimumab or infliximab in normal eyes.**

862 Quantification of the retinal thickness from the boundaries of the ganglion cell layer (GCL) to  
863 the outer nuclear layer (ONL) shows **(A)** 4 mg adalimumab did not cause any change in the  
864 retinal thickness. **(B)** 40 mg adalimumab caused significant increase in the thickness of the  
865 superior quadrant 50 days post injection. **(C)** 100 mg infliximab did not cause any appreciable  
866 change in retinal thickness.

867 p-Phenylenediamine (PPD) staining of the optic nerves 50 days after subconjunctival injection  
868 of **(D)** saline (sham) or **(E, H)** 4 mg adalimumab did not cause optic axon degeneration. **(F, I)**  
869 marked axonal degeneration was evident after subconjunctival injection of 40 mg of  
870 adalimumab. All comparisons were performed using the contralateral un-injected eye. **(G, J)** 100  
871 mg of infliximab did not cause appreciable optic nerve axon degeneration.

872 Scale bar: 50  $\mu$ m. **(A - C)** Two-way ANOVA with Sidak's correction \* $P < 0.05$ , **(H - J)** Student t-  
873 test \*\*\*\* $P < 0.0001$  (sections of one eye).

874

875

876

877

878

879

880

881

882

883

884

885

886

887

888

889

890

891 **Figure 3. Efficacy: Pilot experiment. Acute protection (3 days) of the retina with**  
892 **subconjunctival adalimumab after corneal burn.**

893 Evaluation of peripheral and central retinal cell apoptosis using TUNEL assay 3 days after acute  
894 corneal surface injury with alkali. **(A, B)** Saline (sham) treatment results in significant cell  
895 apoptosis in all 3 retinal layers. **(C - D)** Subconjunctival administration of 100 mg of infliximab  
896 15 minutes after the injury results in appreciable reduction of retinal cell apoptosis. **(E, F)**  
897 Subconjunctival injection of 20 mg triamcinolone also shows almost complete protection to the  
898 retina, with some apoptosis evident in the ganglion cell layer of the peripheral retina. **(G, H)**  
899 Subconjunctival injection of 4 mg adalimumab provides 100% retinal protection in the peripheral  
900 and central retina.

901 **(I)** Quantification of retinal cell apoptosis following subconjunctival injection of various doses  
902 and drugs. Note that 40 mg adalimumab exacerbates cell apoptosis, indicative of its toxic effect  
903 at high dose, however, 4 mg adalimumab provides the most optimal retinal protection, as  
904 compared in all studied regimens. **(J)** Two-way ANOVA with Tukey's correction. (n=3: 20 mg  
905 trim., 4 mg adalim; n=2: 40 mg adalim; n=1: saline, 100 mg inflix).

906  
907  
908  
909  
910  
911  
912  
913  
914  
915  
916  
917  
918  
919  
920  
921

Updated 10-08-2022

922 **Figure 4. Efficacy: Pilot experiment. Long-term protection (90 days) of the retina with 4 mg**  
923 **subconjunctival adalimumab after corneal burn. (A-D)**

924 Histologic examination (H&E) of the retinas with hematoxylin and eosin shows significantly  
925 increased in retinal thickness ( $p= 0.03$ ,  $n= 3$ ) and reduction in retinal ganglion cell count in the  
926 saline treated group ( $n=3$ ), as compared to adalimumab (4 mg) treated group ( $n=3$ ) which exhibits  
927 minimal changes in retinal thickness and RGC count ( $p= 0.024$ ,  $n= 3$ ), indicative of long-term  
928 neuroprotective effect. **(E - G)** The saline (sham) treated group exhibits significant 55% reduction  
929 in optic nerve axons ( $p=0.014$ ,  $n=3$ ) as compared to adalimumab treated eyes that exhibit minimal  
930 9% loss of optic nerve axons. **(C, D, G)** Student t-test.

931

932

933

934

935

936

937

938

939

940

941

942

943

944

945

946

947

948

949

950

951

Updated 10-08-2022

952 **Table 1.** Summary of results of testing adalimumab, infliximab and triamcinolone, injected  
953 subconjunctivally, for **(A)** toxicity and **(B)** efficacy in reducing inflammation of the retinal  
954 ganglion cells and optic nerve degeneration, after alkali burn to the corneas of rabbits. (The  
955 results from Zhou, Robert et al. drug delivery systems with infliximab are added for comparison.  
956 See p. 14, Refs 65, 75).

957 Adalim=adalimumab, Infix=infliximab, Triam=triamcinolone, DDS=drug delivery system  
958 (inserted subconjunctivally)

959

960

961

962

963

964

965

966

967

968

969

970

971

972

973

974

975 **Supplemental Figure 1. Toxicity: Dark-adapted ERG assessment after subconjunctival**  
976 **injection of adalimumab and infliximab.**

977 Dark-adapted electroretinography (ERG) using 0.01, 3 and 10 cd.s/m<sup>2</sup> light intensities after  
978 subconjunctival injection of **(A - C)** 40 mg adalimumab and **(D - F)** 100 mg infliximab.  
979 The contralateral eyes were used as internal controls, while saline (sham) injected eyes served as  
980 treatment controls. ERG quantification in **(G)** 40 mg adalimumab injected eyes, **(H)** their  
981 corresponding saline control, **(I)** 100 mg infliximab, and **(J)** their corresponding saline control.  
982 Measurements were performed at baseline (7 days before injection) and 3, 7, 28, and 45 days  
983 after injection. **(G - J)** Quantification was performed for “a” and “b”-wave “A”plitude and  
984 “T”ime responses at “0.01”, “3”, and “10” cd.s/m<sup>2</sup> light intensities in the “OD” injected and “OS”  
985 un-injected eyes. High doses of subconjunctival injection of adalimumab and infliximab did not  
986 cause appreciable changes in the dark-adapted ERG responses (of optic nerve degeneration after  
987 40 mg of adalimumab).

988

989

990

991

992

993

994

995

996

997

998

Updated 10-08-2022

999 **Supplemental Figure 2. Toxicity: Light-adapted ERG assessment after subconjunctival**  
1000 **injection of adalimumab and infliximab.**

1001 Light-adapted electroretinography (ERG) using 3 cd.s/m<sup>2</sup> flash and flicker light stimulation after  
1002 subconjunctival injection of **(A, B)** 40 mg adalimumab and **(C, D)** 100 mg infliximab.

1003 Their contralateral eyes were used as internal controls, while saline (sham) injected eyes served  
1004 as treatment controls. ERG quantification in **(E)** 40 mg adalimumab injected eyes, **(F)** their  
1005 corresponding saline control, **(G)** 100 mg infliximab, and **(H)** their corresponding saline control.

1006 Measurements were performed at baseline (7 days before injection) and 3, 7, 28, and 45 days  
1007 after injection. **(E - H)** Quantification was performed for “a” and “b”-wave “A” amplitude and  
1008 “T” Time responses at “3” cd.s/m<sup>2</sup> “flash” and “flicker” light intensity in the “OD” injected and  
1009 “OS” un-injected eyes. High dose subconjunctival injection of adalimumab and infliximab did  
1010 not cause appreciable changes in the light-adapted ERG responses.

1011



Figure 1

Day of injection

1 day post-injection

50 days post-injection

Infliximab 100mg (0.8mL) SC

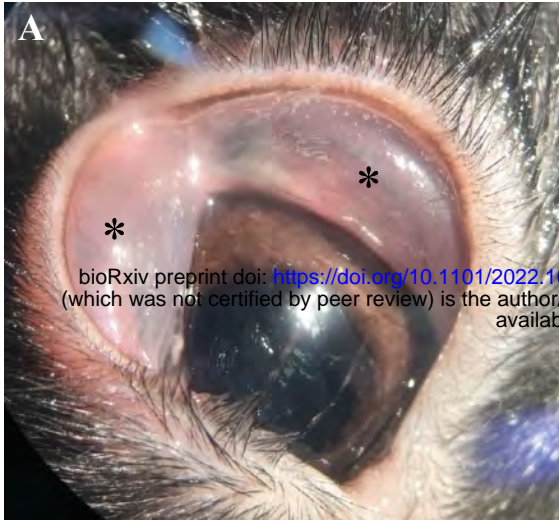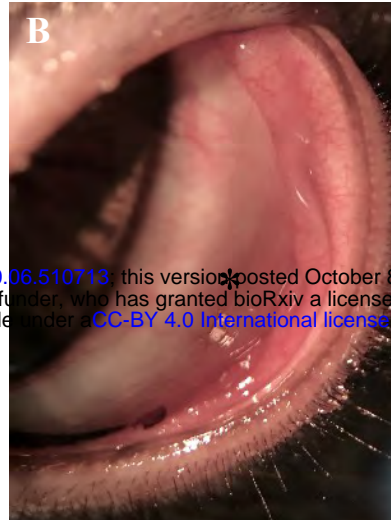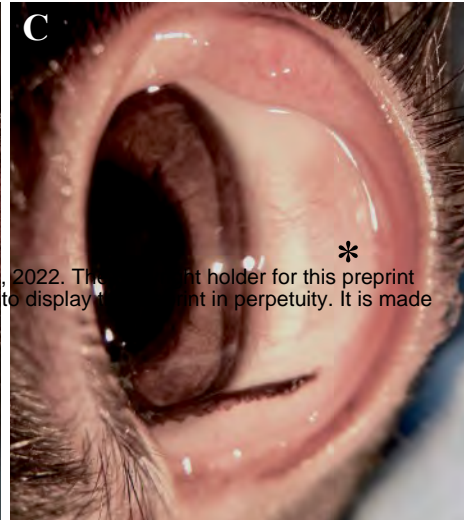

Adalimumab 4mg (0.08mL) SC

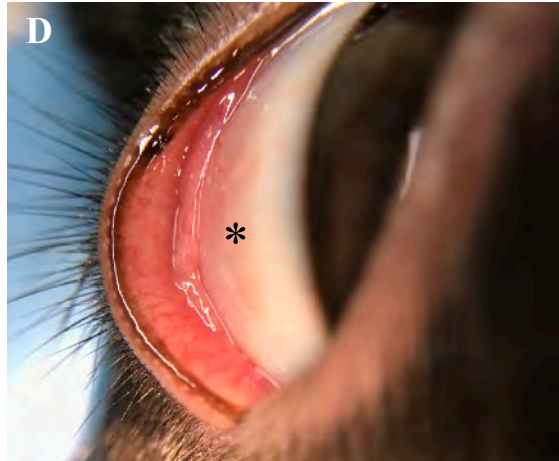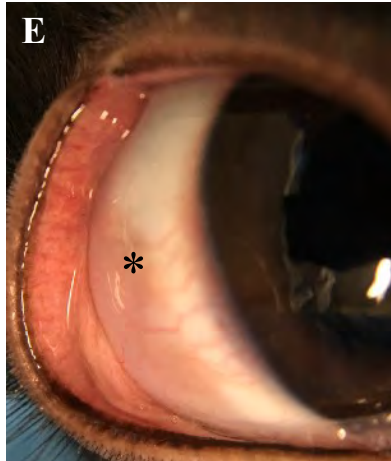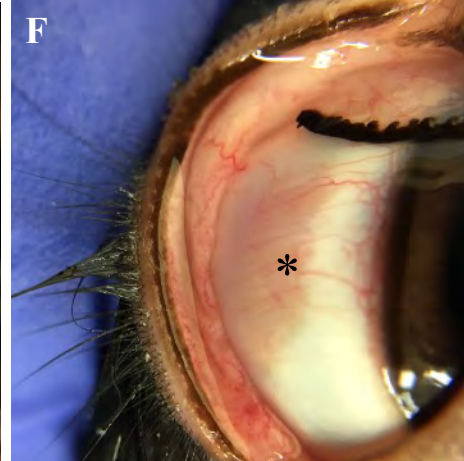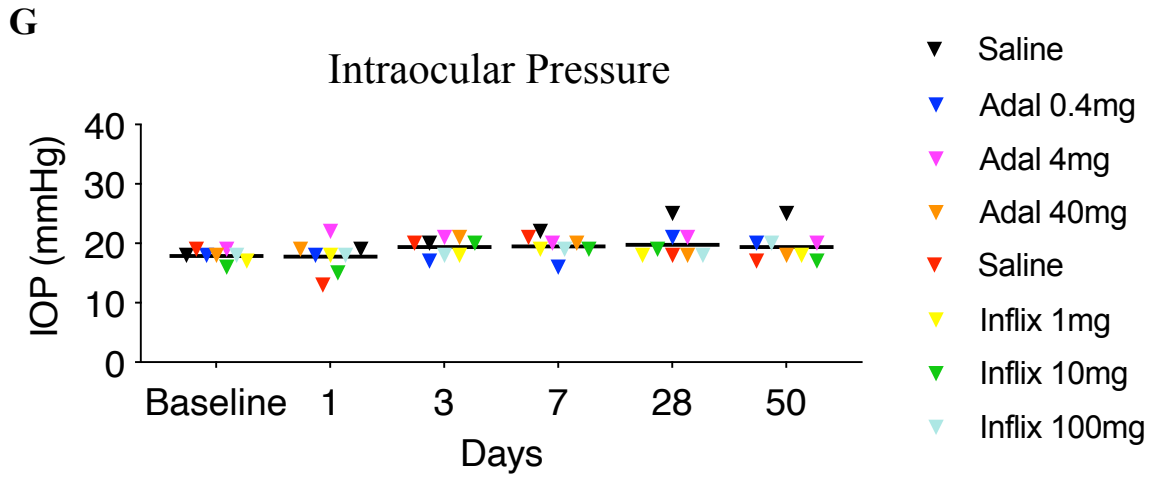

Figure 2

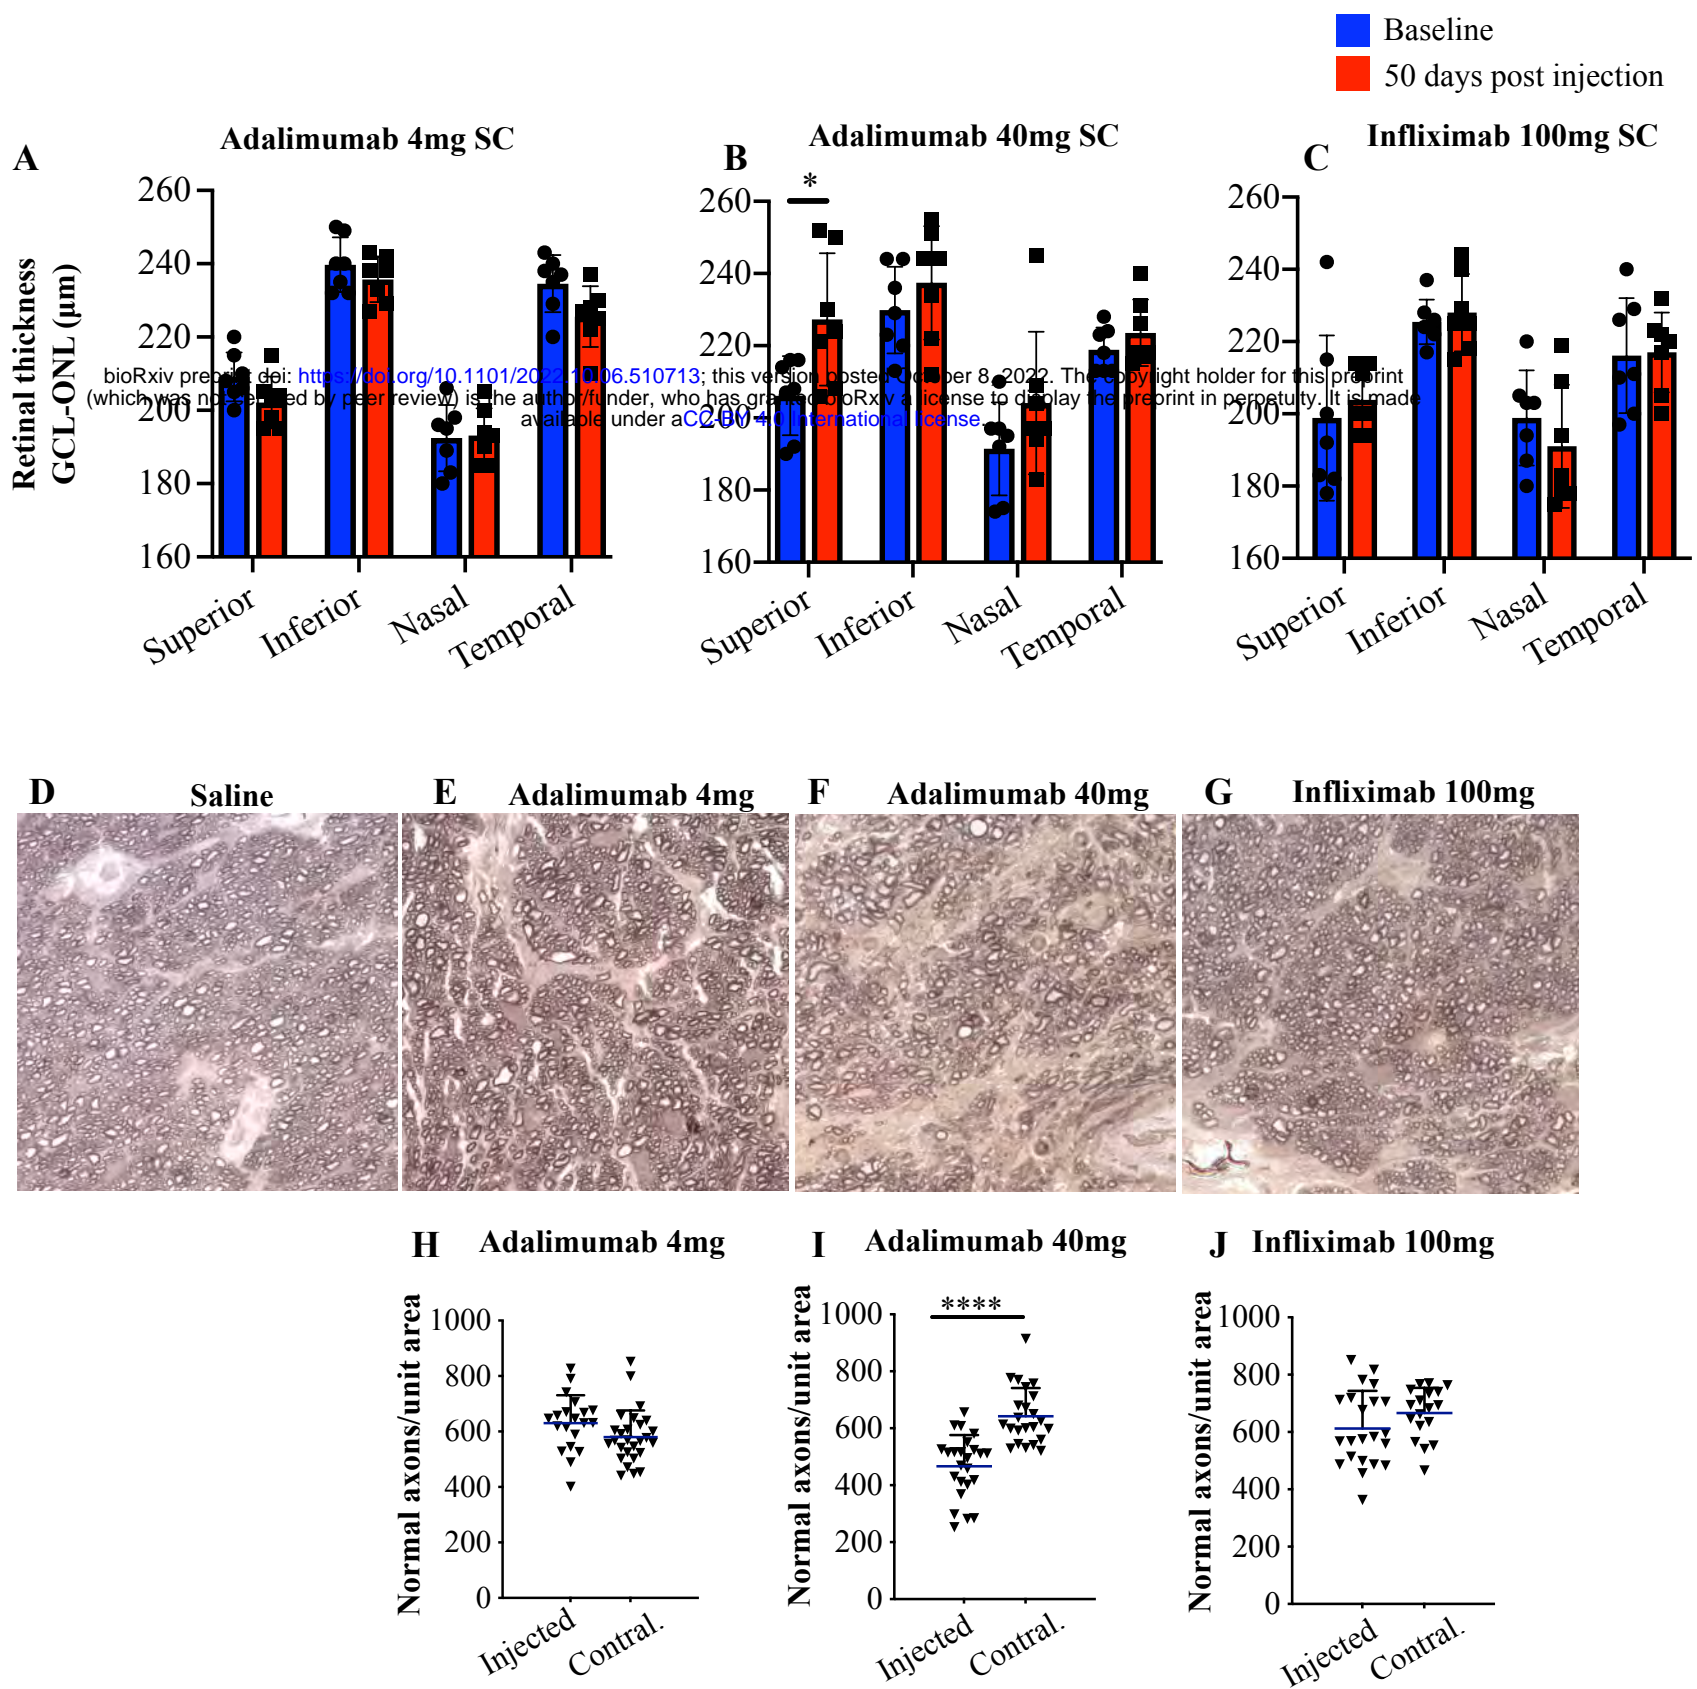

Figure 3

Peripheral retina - 3 days

Central retina - 3 days

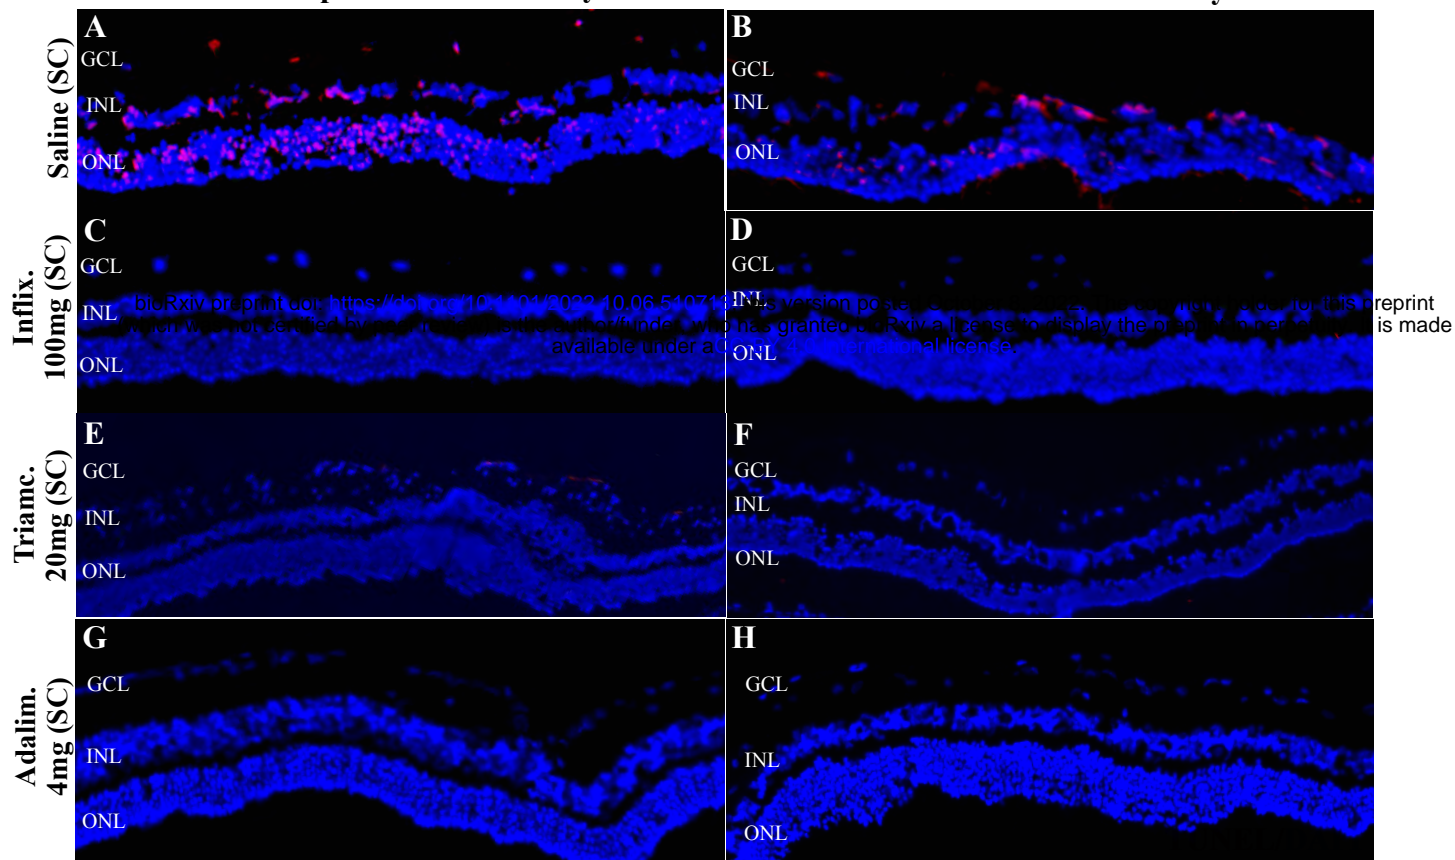

Apoptosis 3 days post-injury

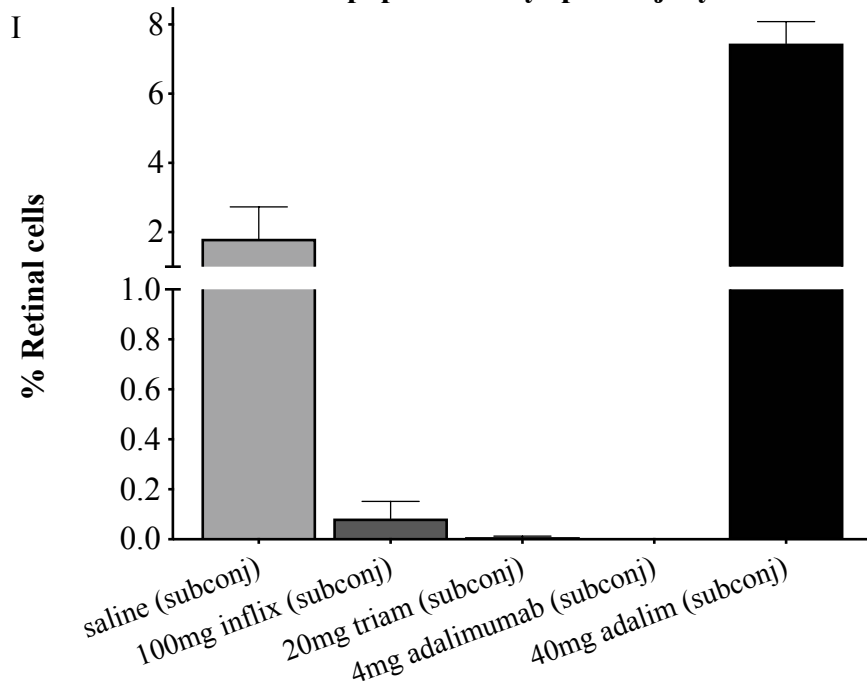

| Tukey's multiple comparisons test                  | Adj. P-value |
|----------------------------------------------------|--------------|
| 20mg triam (subconj) vs. saline (subconj)          | **           |
| 20mg triam (subconj) vs. 100mg infix (subconj)     | ns           |
| 20mg triam (subconj) vs. 4mg adalimumab (subconj)  | ns           |
| 20mg triam (subconj) vs. 40mg adalim (subconj)     | ****         |
| saline (subconj) vs. 100mg infix (subconj)         | *            |
| saline (subconj) vs. 4mg adalimumab (subconj)      | **           |
| saline (subconj) vs. 40mg adalim (subconj)         | ****         |
| 100mg infix (subconj) vs. 4mg adalimumab (subconj) | ns           |
| 100mg infix (subconj) vs. 40mg adalim (subconj)    | ****         |
| 4mg adalimumab (subconj) vs. 40mg adalim (subconj) | ****         |

Figure 4

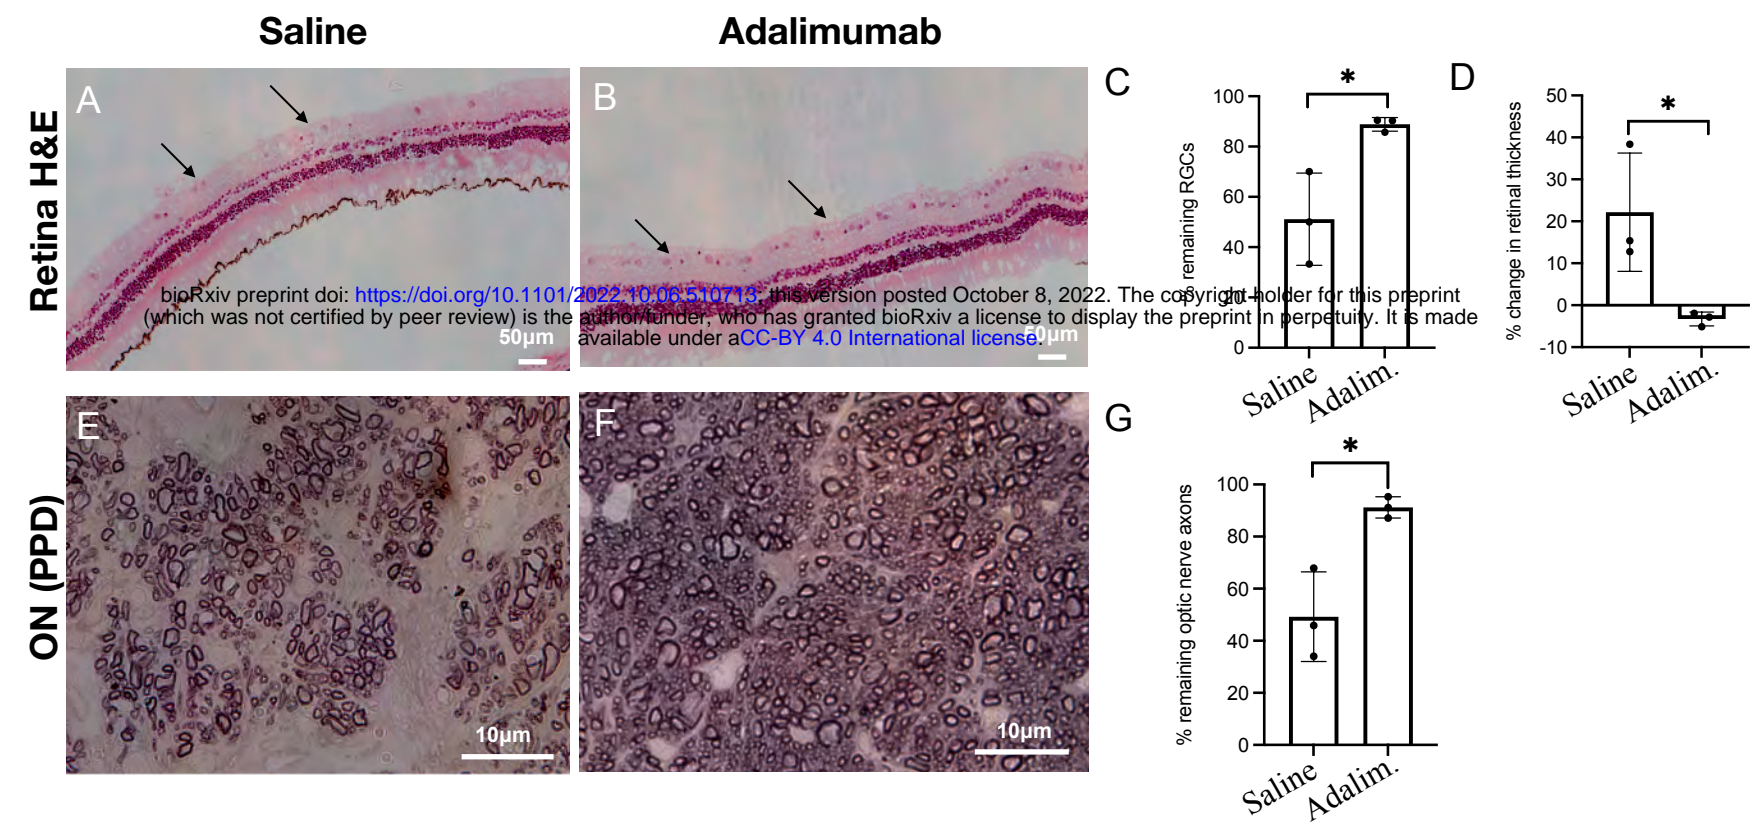

**Table 1.**

**Toxicity to retina or optic nerve from subconjunctival injection of drugs in normal rabbit eyes**

| <b>Drug concentration</b> | <b>Observation days/Toxicity</b> |    | <b>Summarized from</b> |
|---------------------------|----------------------------------|----|------------------------|
| Adalim 0.4 mg             | 50                               | -  | Fig 1                  |
| Adalim 4 mg               | 50                               | -  | Figs 1, 2              |
| Adalim 40 mg              | 50                               | ++ | Figs 1, 2              |
| Inflix 1 mg               | 50                               | -  | Fig 1                  |
| Inflix 10 mg              | 50                               | -  | Fig 1                  |
| Inflix 100 mg             | 50                               | -  | Figs 1, 2              |
| Saline (sham)             | 50                               | -  | Figs 1, 2              |

**Efficacy: Protective effect on retina and optic nerve after burn to cornea**

| <b>Drug concentration</b> | <b>Observation days/Efficacy</b> |     |    |     | <b>Summarized from</b> |
|---------------------------|----------------------------------|-----|----|-----|------------------------|
| Adalim 0.4 mg             | 3                                |     |    |     |                        |
| Adalim 4 mg               | 3                                | +++ | 90 | +++ | Figs 3, 4              |
| Adalim 40 mg              | 3                                |     |    |     |                        |
| Inflix 1 mg               | 3                                |     |    |     |                        |
| Inflix 10 mg              | 3                                |     |    |     |                        |
| Inflix 100 mg             | 3                                | ++  |    |     | Fig 3                  |
| Triam 20 mg               | 3                                | ++  |    |     | Fig 3                  |
| Saline (sham)             | 3                                | -   | 90 | -   | Figs 3, 4              |
| (DDS' Inflix              |                                  |     | 90 | +++ | p. 14, refs 65, 75)    |

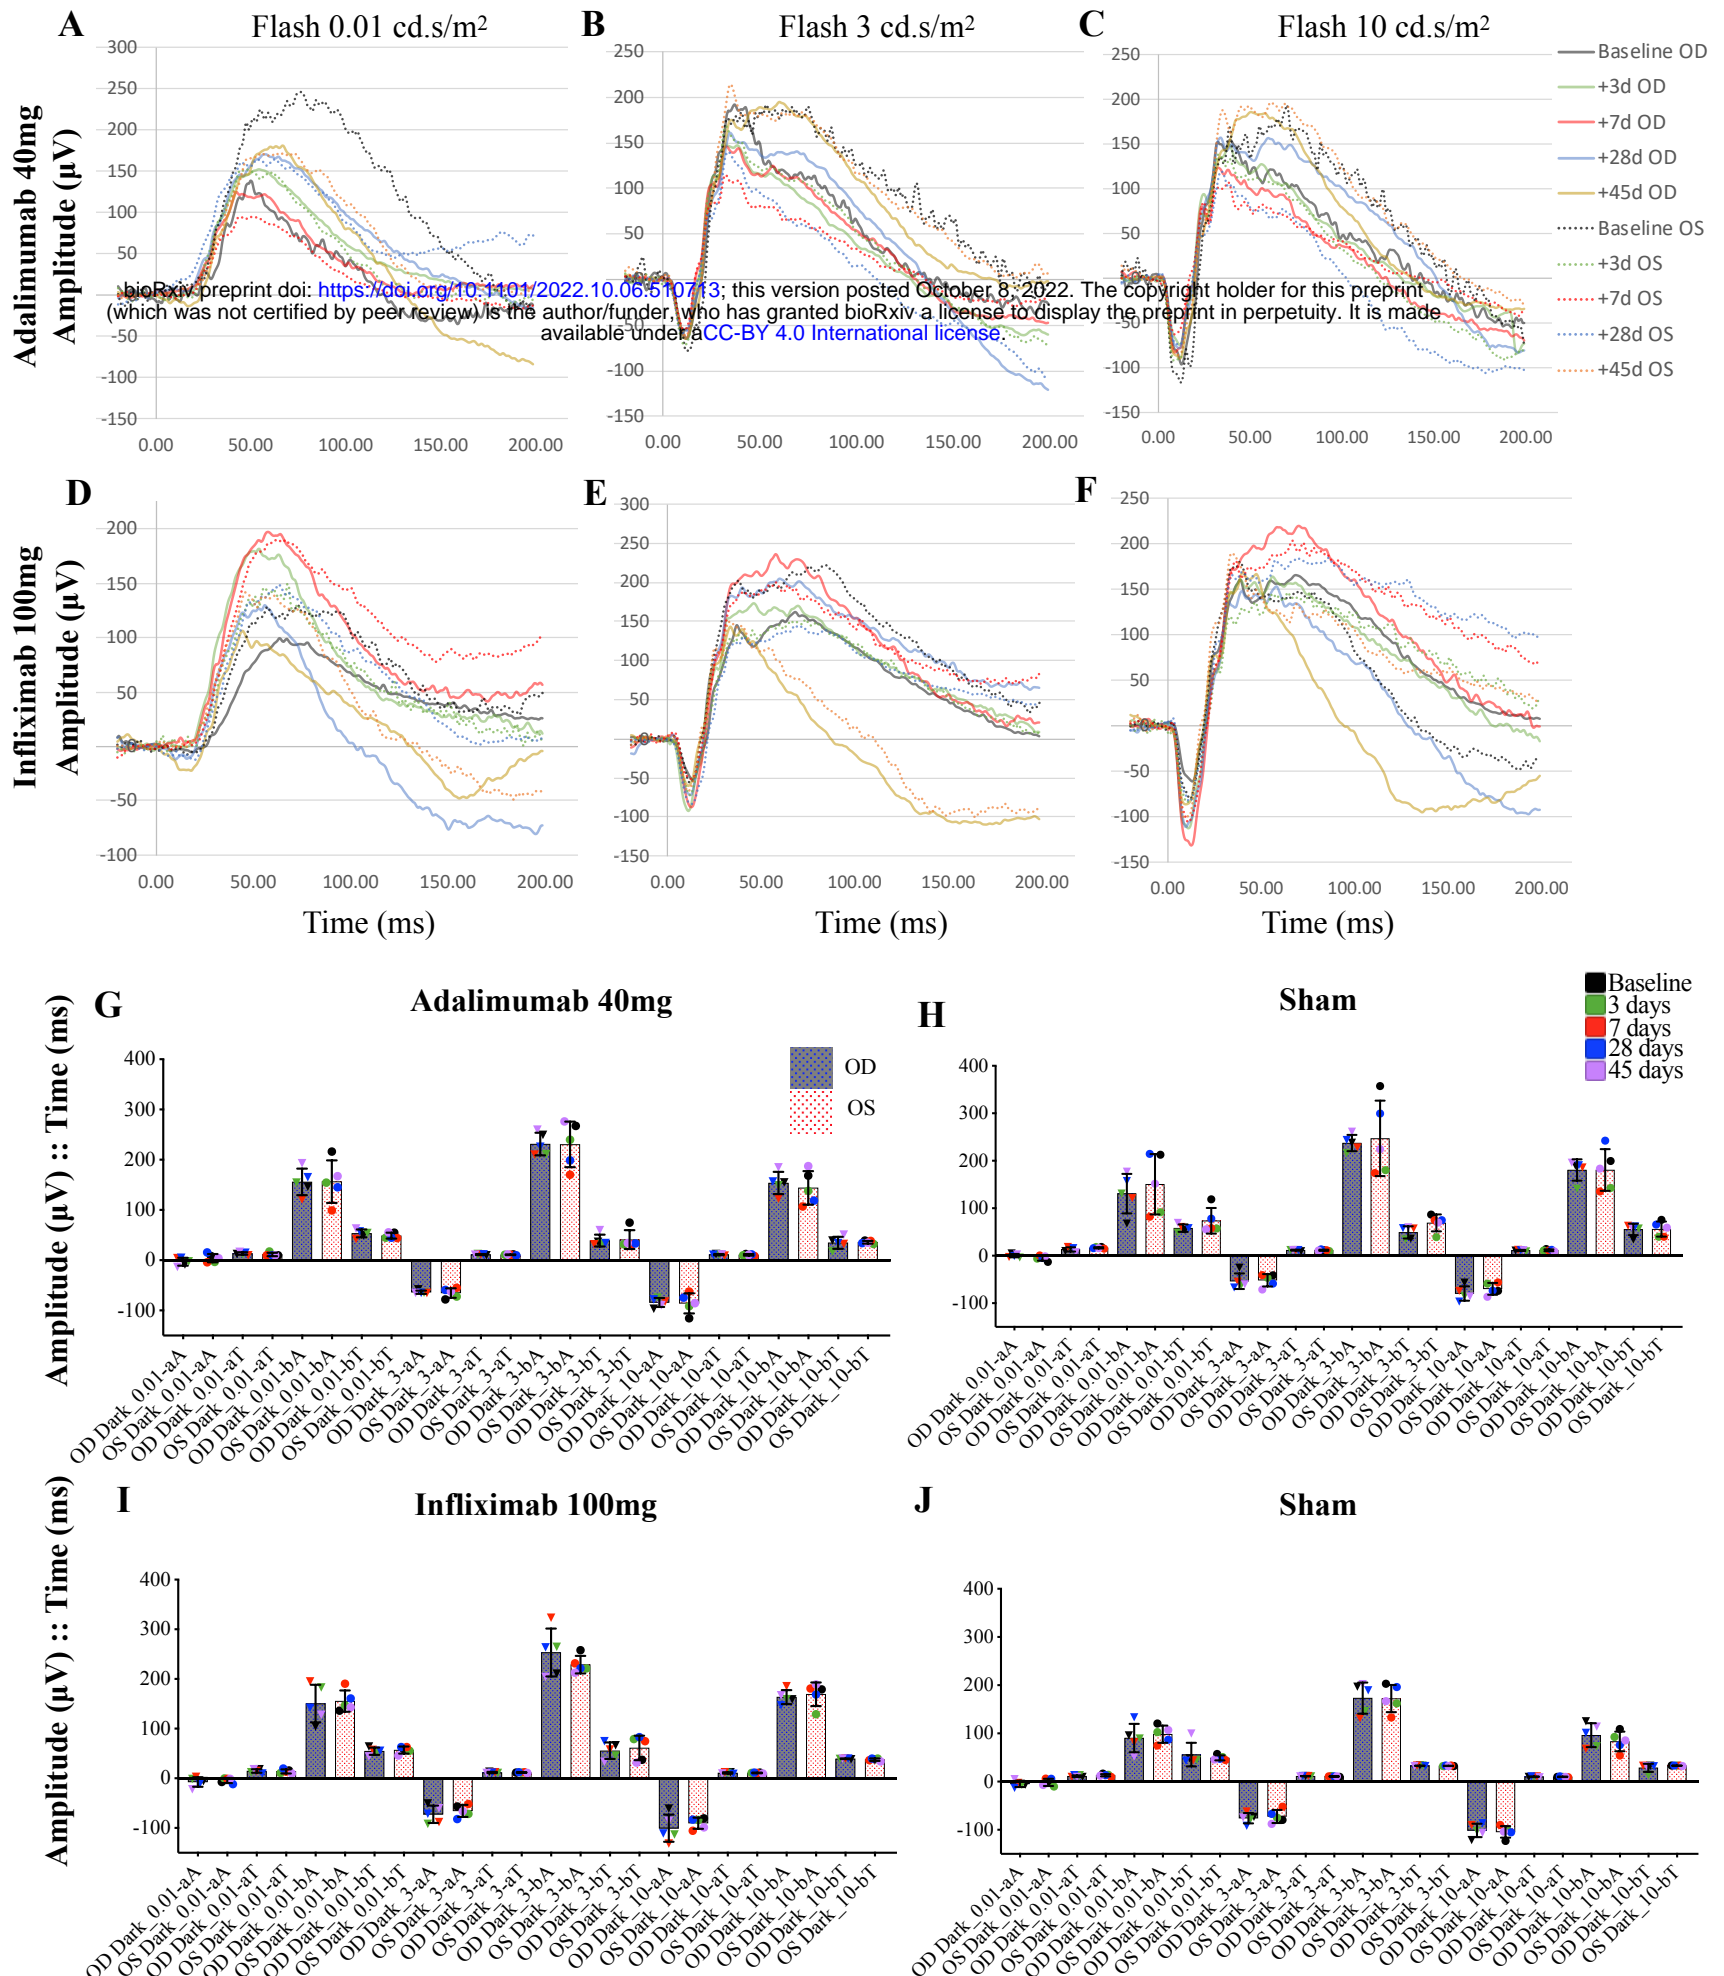

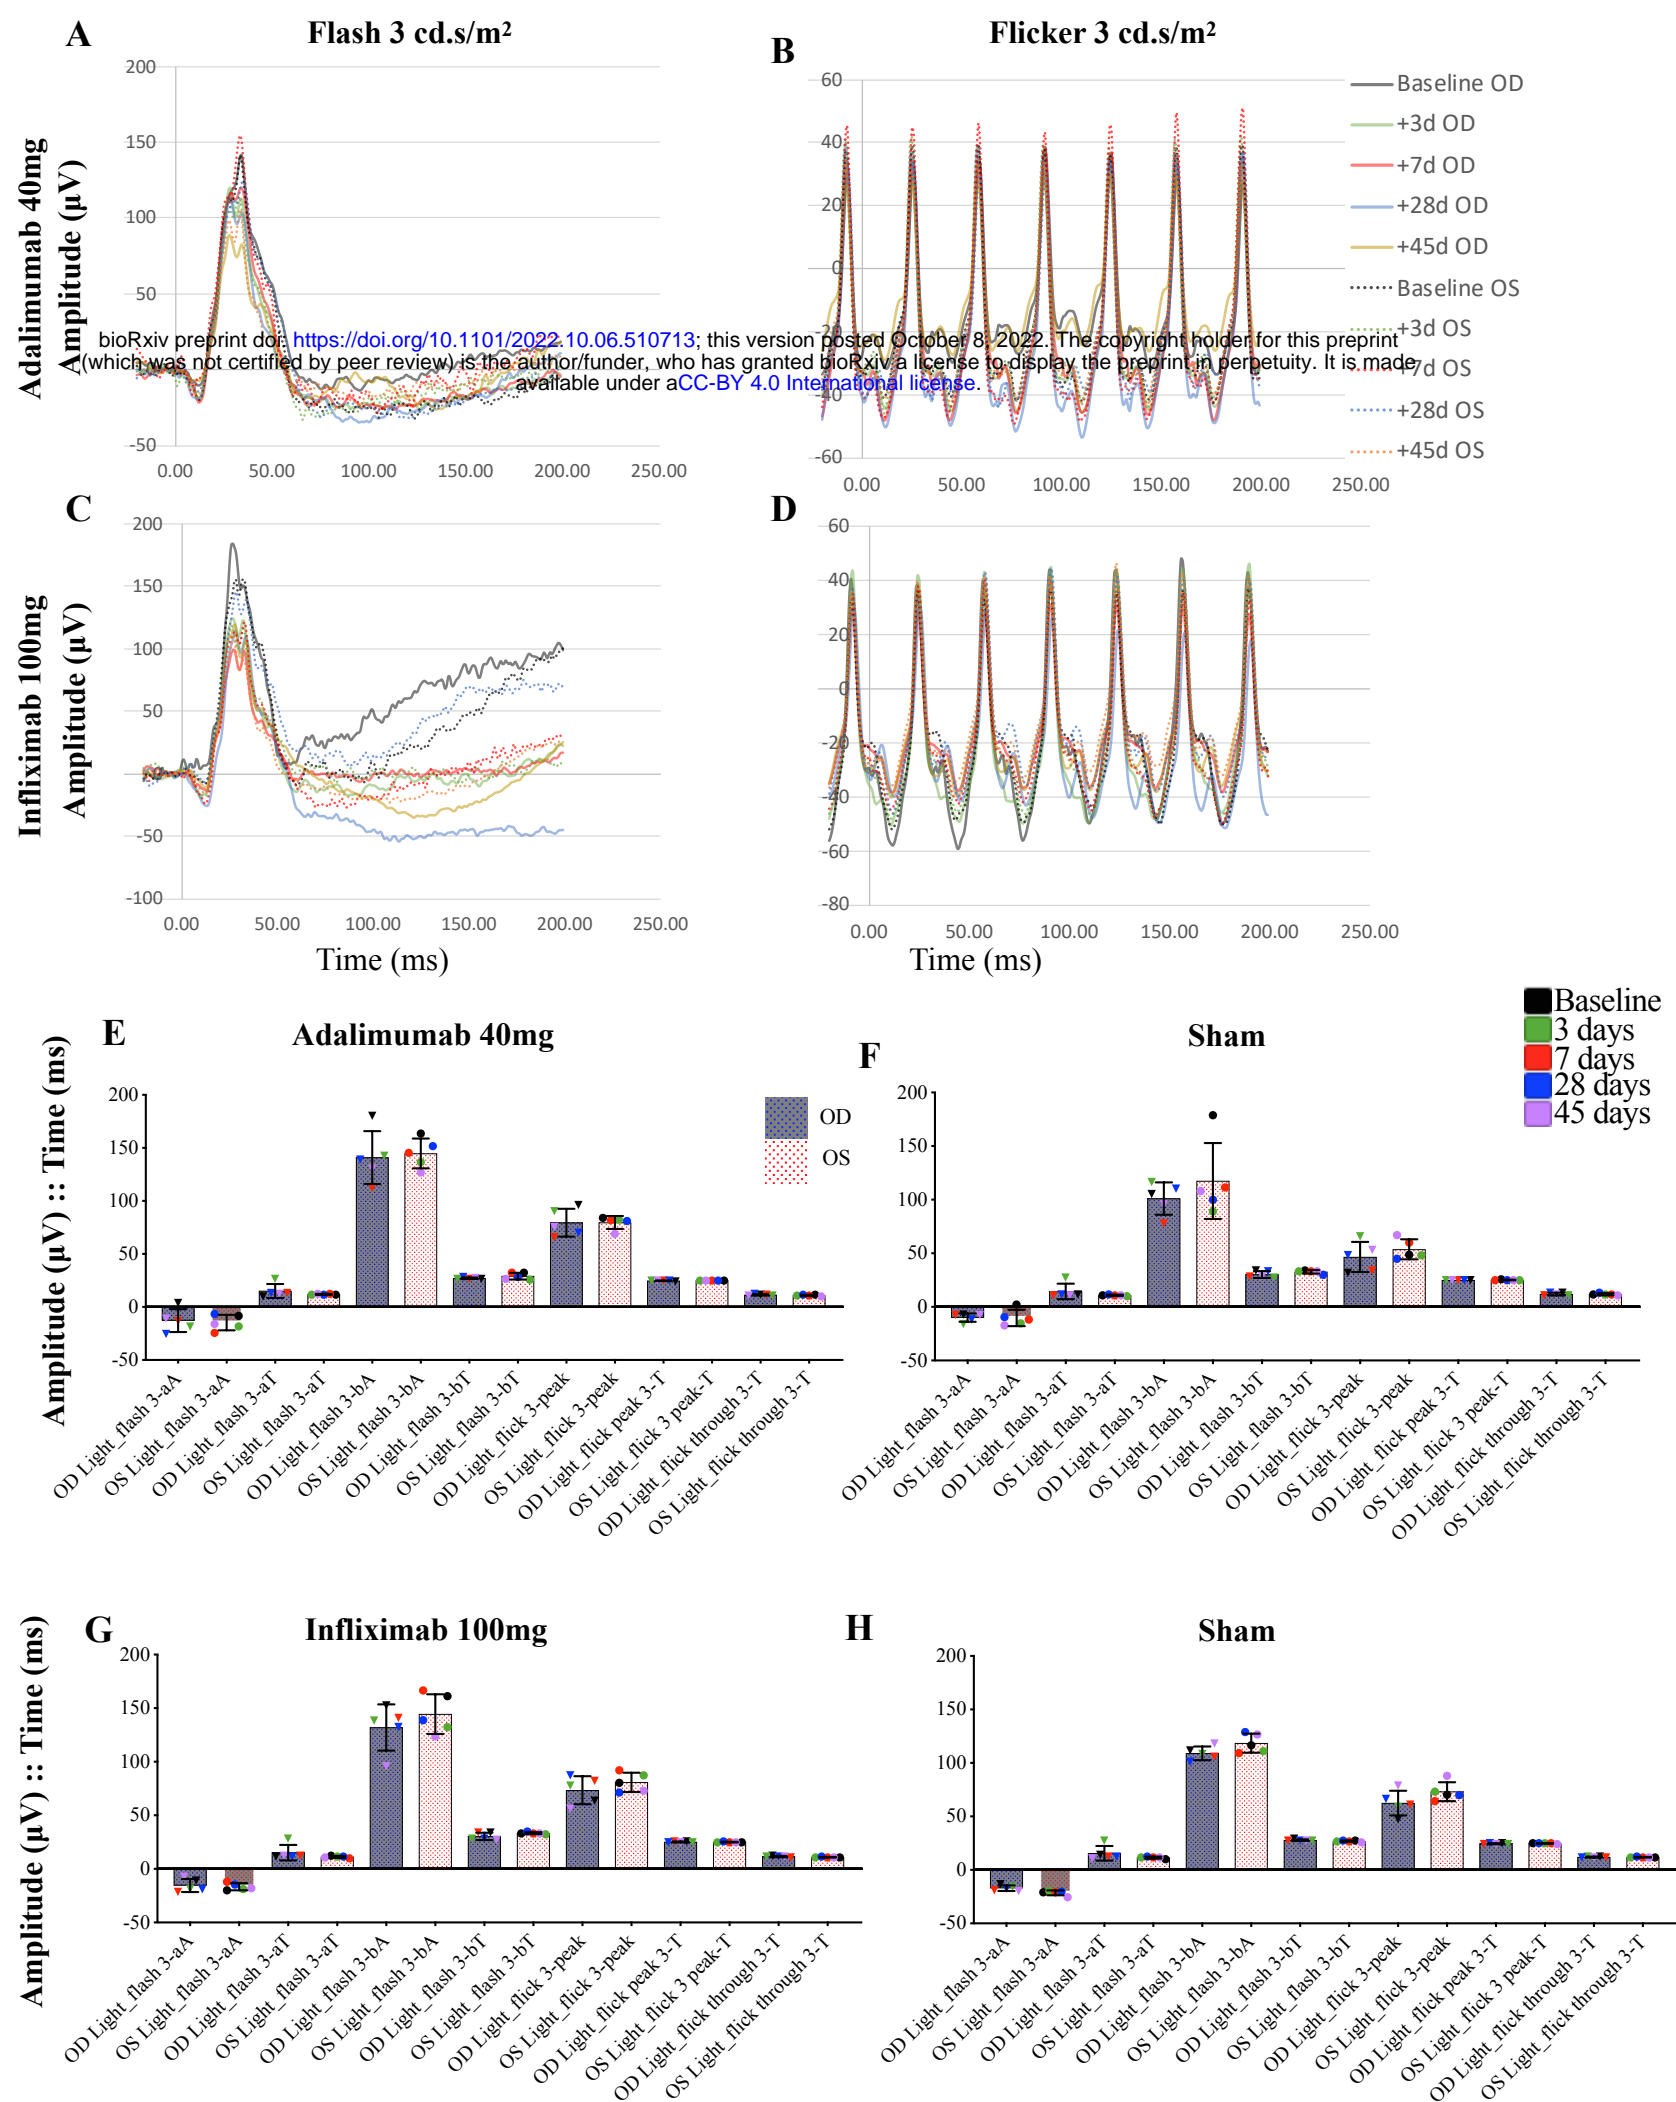

Source: https://www.biorxiv.org/content/10.1101/2022.10.06.510713v2.full.pdf
